# Supplementary material
Source: publisher site journal article supplement (https://www.dovepress.com/article/408510)
Supplement: Supplementary file 1 [file get_supplementary_file.php]

**Is age the most important risk factor in COVID-19 patients? The relevance of comorbidity: A retrospective analysis of 10,551 hospitalizations**

Supplementary file

Contents

[Supplementary Figures: methods 3](#_Toc138062531)

[**Figure S1.** Prevalence of SARS-CoV-2 variants of concern throughout the investigated period. **A**: Pango lineages. **B**: WHO nomenclature. Source: http://covidtag.paseq.org/ 3](#_Toc138062532)

[Supplementary Figures: individual distribution across the Queralt DxS groups through the successive waves 4](#_Toc138062533)

[**Figure S2.** Individual distribution across the Queralt DxS groups, according to age and sex. **First wave.** 4](#_Toc138062534)

[**Figure S3.** Individual distribution across the Queralt DxS groups, according to age and sex. **Second wave.** 4](#_Toc138062535)

[**Figure S4.** Individual distribution across the Queralt DxS groups, according to age and sex. **Third wave.** 5](#_Toc138062536)

[**Figure S5.** Individual distribution across the Queralt DxS groups, according to age and sex. **Fourth wave**. 5](#_Toc138062537)

[**Figure S6.** Individual distribution across the Queralt DxS groups, according to age and sex. **Fifth wave.** 5](#_Toc138062538)

[**Figure S7.** Individual distribution across the Queralt DxS groups, according to age and sex. **Sixth wave.** 6](#_Toc138062539)

[**Figure S8.** Individual distribution across the Queralt DxS groups, according to age and sex. **Seventh wave.** 6](#_Toc138062540)

[Supplementary Tables: Main characteristics of individuals admitted in the successive waves 7](#_Toc138062541)

[**Table S1.** Main demographic, clinical, and epidemiological characteristics of individuals admitted during the **first wave** 7](#_Toc138062542)

[**Table S2.** Main demographic, clinical, and epidemiological characteristics of individuals admitted during the **second wave** 8](#_Toc138062543)

[**Table S3.** Main demographic, clinical, and epidemiological characteristics of individuals admitted during the **third wave.** 9](#_Toc138062544)

[**Table S4.** Main demographic, clinical, and epidemiological characteristics of individuals admitted during the **fourth wave.** 10](#_Toc138062545)

[**Table S5.** Main demographic, clinical, and epidemiological characteristics of individuals admitted during the **fifth wave.** 11](#_Toc138062546)

[**Table S6.** Main demographic, clinical, and epidemiological characteristics of individuals admitted during the **sixth wave.** 12](#_Toc138062547)

[**Table S7.** Main demographic, clinical, and epidemiological characteristics of individuals admitted during the **seventh wave.** 13](#_Toc138062548)

[Supplementary Tables: Adjusted models of age and sex 14](#_Toc138062549)

[**Table S8.** Effect of age (coefficients and odds ratios for age groups) and sex on critical illness using multiple logistic regressions. **First wave**. 14](#_Toc138062550)

[**Table S9.** Effect of age (coefficients and odds ratios for age groups) and sex on critical illness using multiple logistic regressions. **Second wave**. 15](#_Toc138062551)

[**Table S10.** Effect of age (coefficients and odds ratios for age groups) and sex on critical illness using multiple logistic regressions. **Third wave**. 16](#_Toc138062552)

[**Table S11.** Effect of age (coefficients and odds ratios for age groups) and sex on critical illness using multiple logistic regressions. **Fourth wave**. 17](#_Toc138062553)

[**Table S12.** Effect of age (coefficients and odds ratios for age groups) and sex on critical illness using multiple logistic regressions. **Fifth wave**. 18](#_Toc138062554)

[**Table S13.** Effect of age (coefficients and odds ratios for age groups) and sex on critical illness using multiple logistic regressions. **Sixth wave**. 19](#_Toc138062555)

[**Table S14.** Effect of age (coefficients and odds ratios for age groups) and sex on critical illness using multiple logistic regressions. **Seventh wave**. 20](#_Toc138062556)

[Supplementary Tables: Performance of the models 21](#_Toc138062557)

[**Table S15.** Performance of the models for explaining critical illness. **First wave.** 21](#_Toc138062558)

[**Table S16.** Performance of the models for explaining critical illness. **Second wave.** 22](#_Toc138062559)

[**Table S17.** Performance of the models for explaining critical illness. **Third wave.** 23](#_Toc138062560)

[**Table S18.** Performance of the models for explaining critical illness. **Fourth wave.** 24](#_Toc138062561)

[**Table S19.** Performance of the models for explaining critical illness. **Fifth wave.** 25](#_Toc138062562)

[**Table S20.** Performance of the models for explaining critical illness. **Sixth wave.** 26](#_Toc138062563)

[**Table S21.** Performance of the models for explaining critical illness. **Seventh wave.** 27](#_Toc138062564)

[Supplementary Tables: Causal mediation analysis by wave 28](#_Toc138062565)

[**Table S22.** Causal mediation effect, direct effect, and proportion of mediation effect by comorbidity measures. **First wave**. 28](#_Toc138062566)

[**Table S23.** Causal mediation effect, direct effect, and proportion of mediation effect by comorbidity measures. **Second wave**. 29](#_Toc138062567)

[**Table S24.** Causal mediation effect, direct effect, and proportion of mediation effect by comorbidity measures. **Third wave**. 30](#_Toc138062568)

[**Table S25.** Causal mediation effect, direct effect, and proportion of mediation effect by comorbidity measures. **Fourth wave**. 31](#_Toc138062569)

[**Table S27.** Causal mediation effect, direct effect, and proportion of mediation effect by comorbidity measures. **Sixth wave**. 33](#_Toc138062570)

[**Table S28.** Causal mediation effect, direct effect, and proportion of mediation effect by comorbidity measures. **Seventh wave**. 34](#_Toc138062571)

# Supplementary Figures: methods

## **Figure S1.** Prevalence of SARS-CoV-2 variants of concern throughout the investigated period. **A**: Pango lineages. **B**: WHO nomenclature. Source: <http://covidtag.paseq.org/>


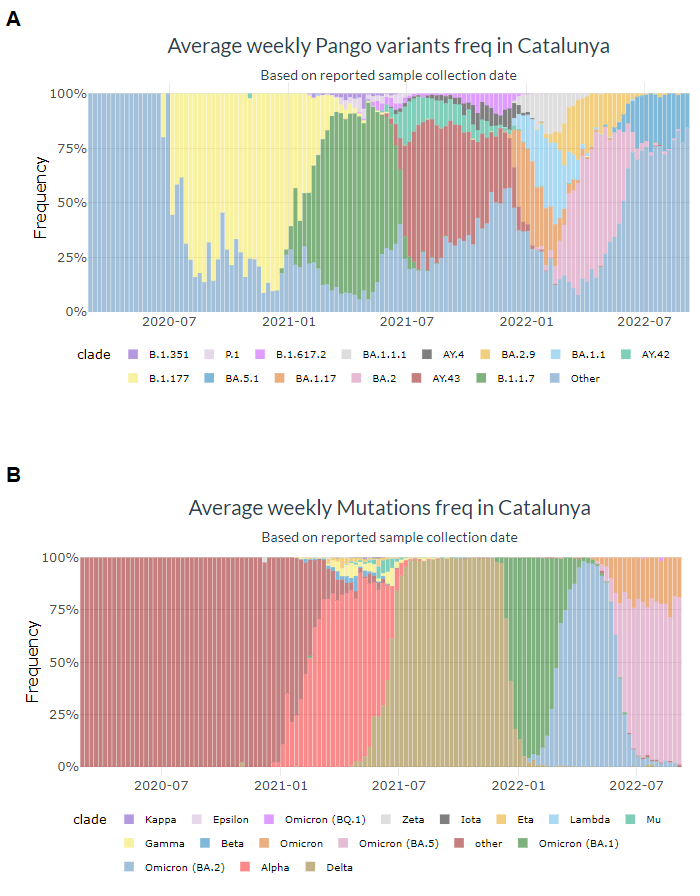


# Supplementary Figures: individual distribution across the Queralt DxS groups through the successive waves

## **Figure S2.** Individual distribution across the Queralt DxS groups, according to age and sex. **First wave.**


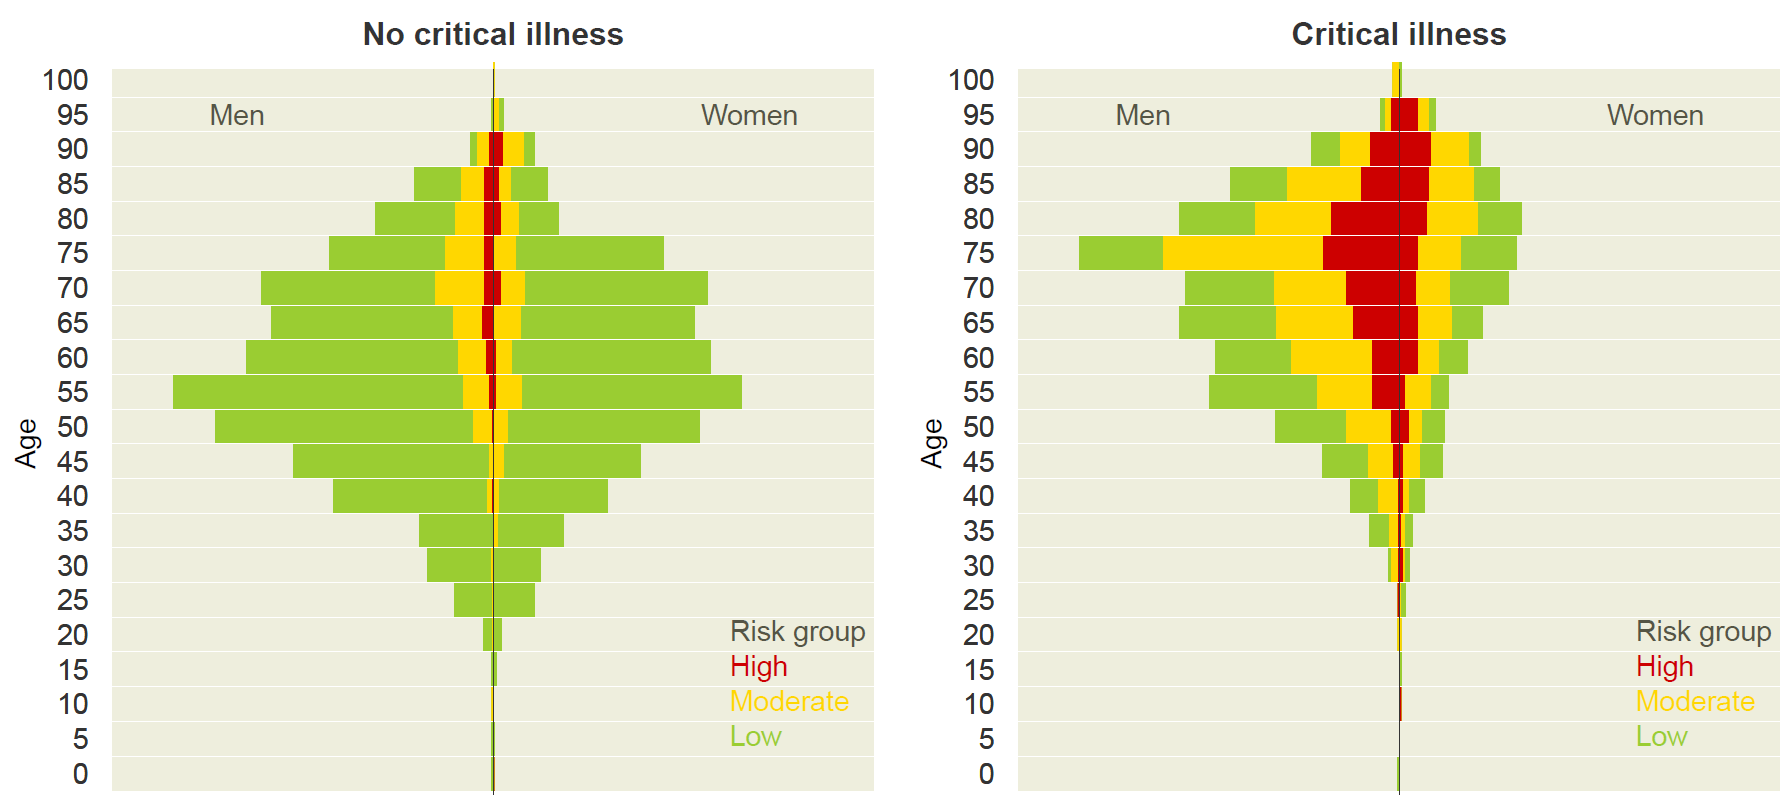


## **Figure S3.** Individual distribution across the Queralt DxS groups, according to age and sex. **Second wave.**


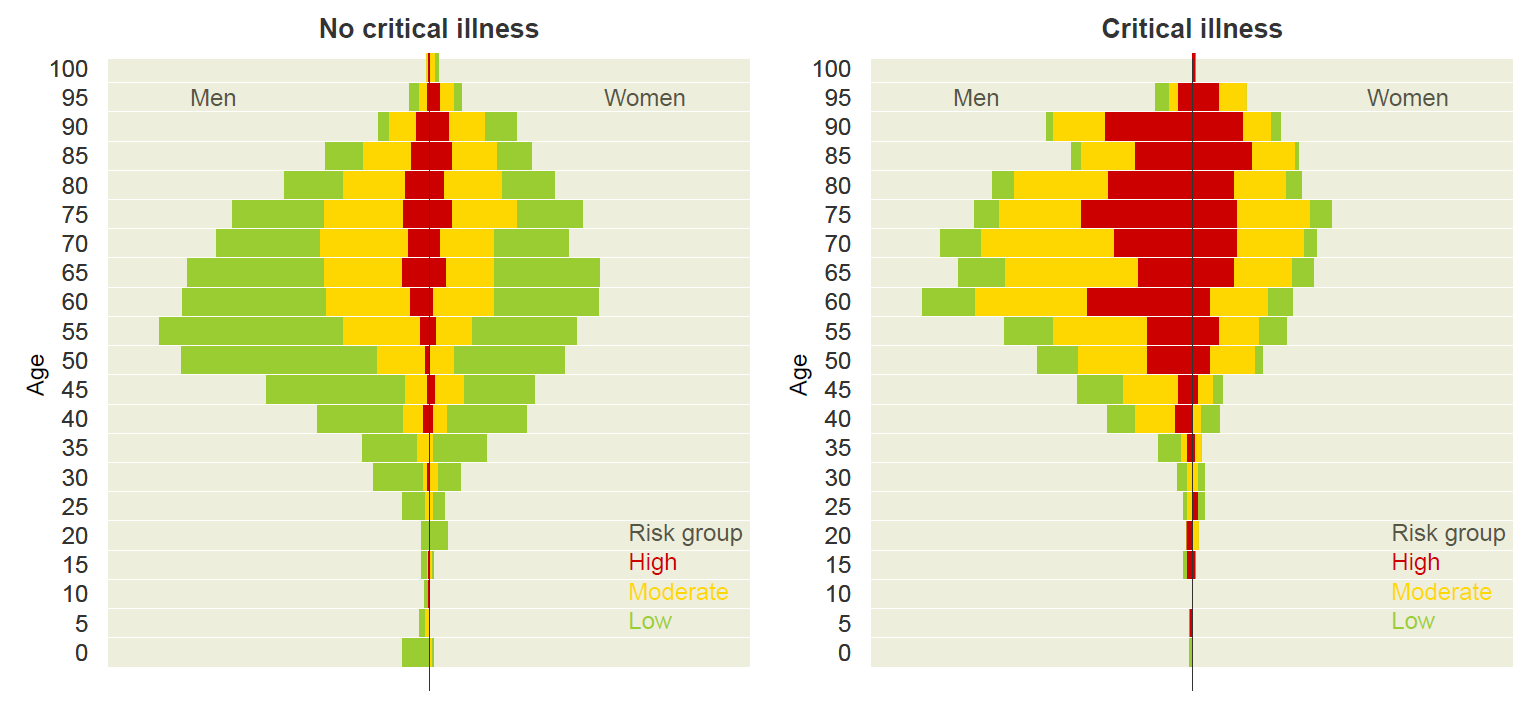


## **Figure S4.** Individual distribution across the Queralt DxS groups, according to age and sex. **Third wave.**


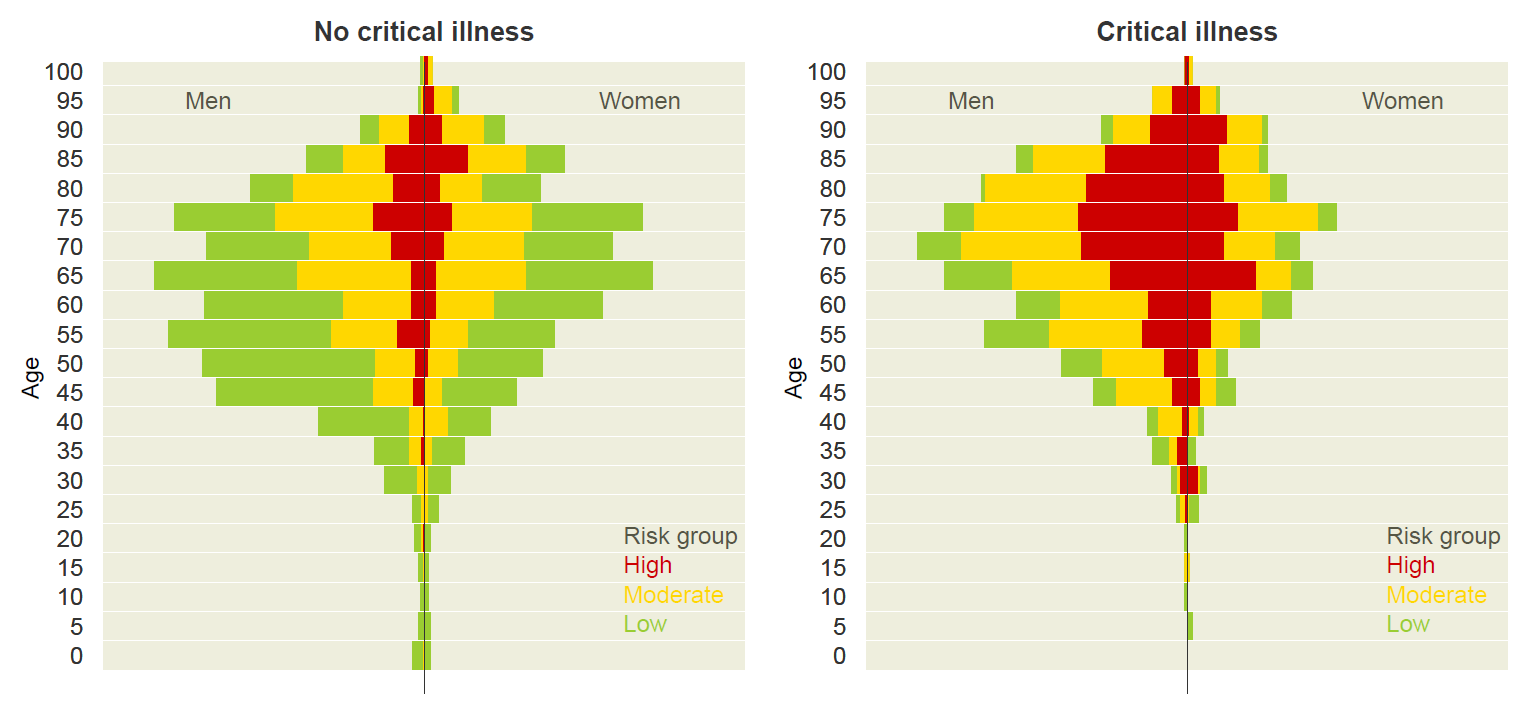


## **Figure S5.** Individual distribution across the Queralt DxS groups, according to age and sex. **Fourth wave**.


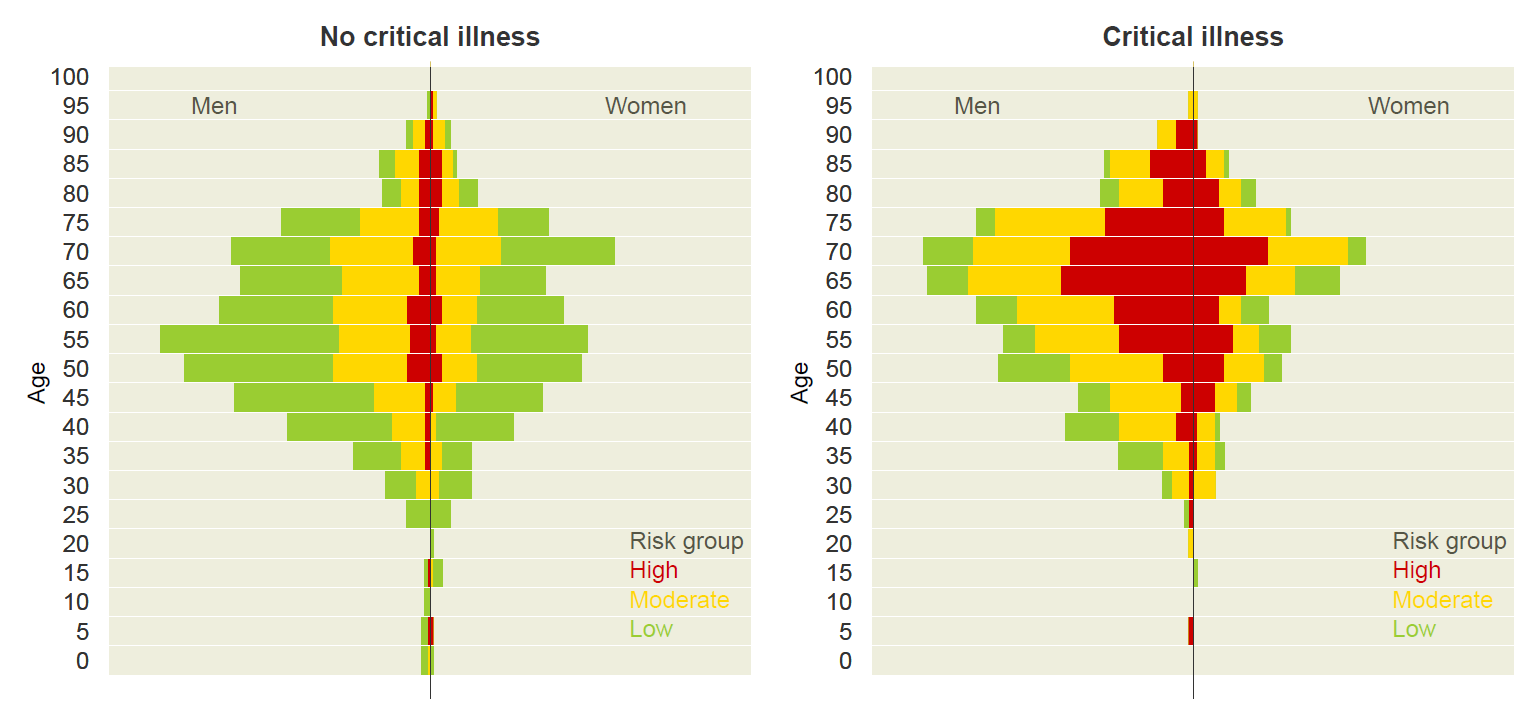


## **Figure S6.** Individual distribution across the Queralt DxS groups, according to age and sex. **Fifth wave.**


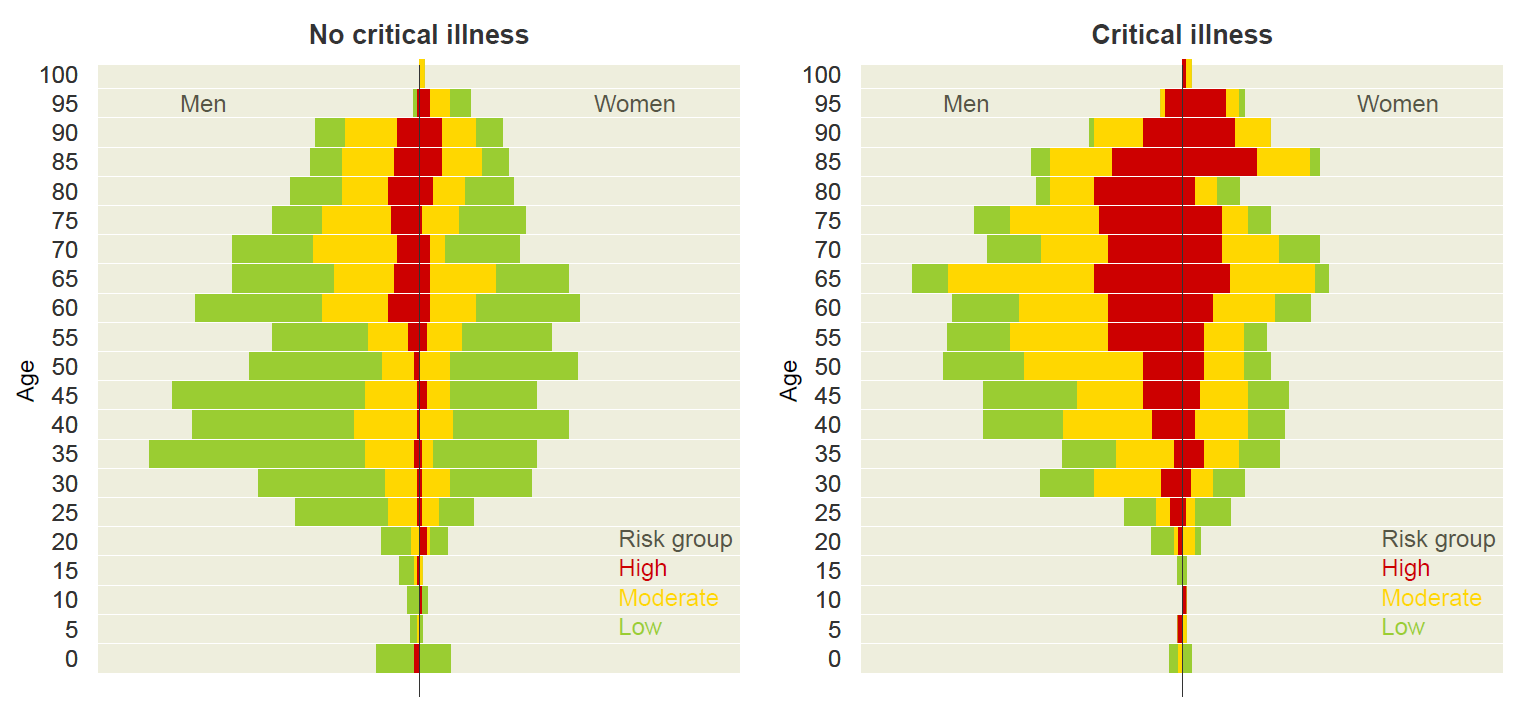


## **Figure S7.** Individual distribution across the Queralt DxS groups, according to age and sex. **Sixth wave.**


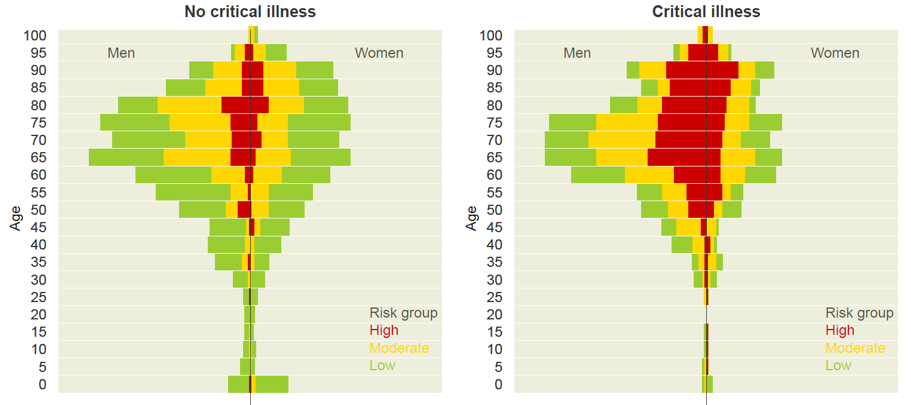


## **Figure S8.** Individual distribution across the Queralt DxS groups, according to age and sex. **Seventh wave.**


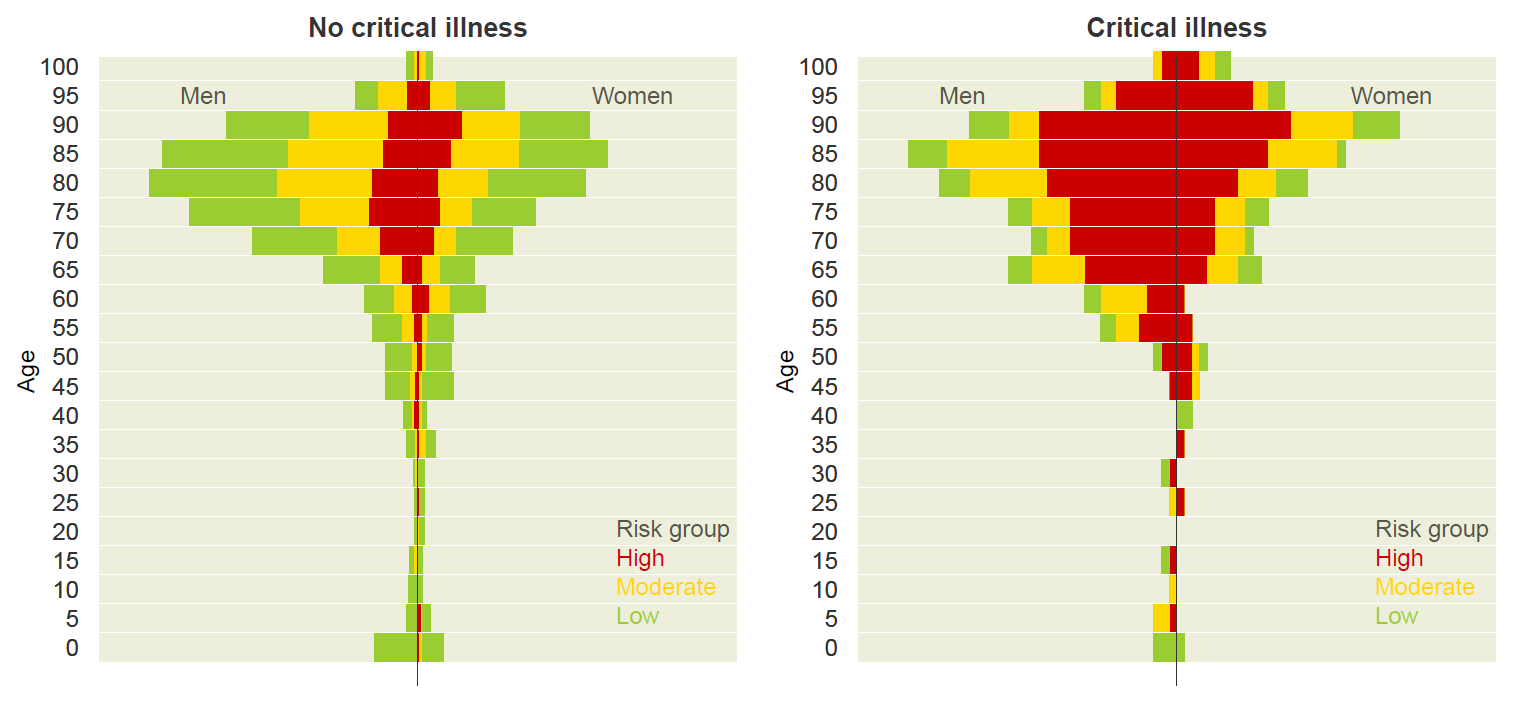


# Supplementary Tables: Main characteristics of individuals admitted in the successive waves

## **Table S1.** Main demographic, clinical, and epidemiological characteristics of individuals admitted during the **first wave**

|  | **No critical illness** | **Critical illness** | **Total** | ***P*** |
| --- | --- | --- | --- | --- |
| Age |  |  |  | < 0.001 |
| Mean (SD) | 57.9 (15.2) | 68.3 (14.9) | 61.5 (15.9) |  |
| Age group |  |  |  | < 0.001 |
| 0 - 39 | 289 (84.8%) | 52 (15.2%) | 341 (100.0%) |  |
| 40 - 49 | 436 (81.5%) | 99 (18.5%) | 535 (100.0%) |  |
| 50 - 59 | 631 (75.2%) | 208 (24.8%) | 839 (100.0%) |  |
| 60 - 69 | 524 (64.7%) | 286 (35.3%) | 810 (100.0%) |  |
| 70 - 79 | 441 (54.7%) | 365 (45.3%) | 806 (100.0%) |  |
| 80 -> | 183 (36.4%) | 320 (63.6%) | 503 (100.0%) |  |
| Sex |  |  |  | < 0.001 |
| Men | 1367 (60.3%) | 901 (39.7%) | 2268 (100.0%) |  |
| Women | 1137 (72.6%) | 429 (27.4%) | 1566 (100.0%) |  |
| Hospital |  |  |  | < 0.001 |
| Arnau de Vilanova | 143 (54.2%) | 121 (45.8%) | 264 (100.0%) |  |
| Joan XXIII | 64 (52.9%) | 57 (47.1%) | 121 (100.0%) |  |
| Verge de la Cinta | 29 (64.4%) | 16 (35.6%) | 45 (100.0%) |  |
| Dr Trueta | 176 (59.1%) | 122 (40.9%) | 298 (100.0%) |  |
| Bellvitge | 778 (68.5%) | 358 (31.5%) | 1136 (100.0%) |  |
| Germans Trias | 281 (49.4%) | 288 (50.6%) | 569 (100.0%) |  |
| Vall Hebron | 1033 (73.7%) | 368 (26.3%) | 1401 (100.0%) |  |
| Vaccine |  |  |  |  |
| No vaccine | 2504 (65.3%) | 1330 (34.7%) | 3834 (100.0%) |  |
| 1st dose | 0 (NaN%) | 0 (NaN%) | 0 (NaN%) |  |
| 2nd dose | 0 (NaN%) | 0 (NaN%) | 0 (NaN%) |  |
| 3rd dose | 0 (NaN%) | 0 (NaN%) | 0 (NaN%) |  |
| Wave |  |  |  | < 0.001 |
| 1st wave | 2504 (65.3%) | 1330 (34.7%) | 3834 (100.0%) |  |
| Charlson index |  |  |  | < 0.001 |
| Mean (SD) | 0.7 (1.3) | 1.3 (1.7) | 0.9 (1.5) |  |
| Charlson risk |  |  |  | < 0.001 |
| Low | 1631 (73.7%) | 583 (26.3%) | 2214 (100.0%) |  |
| Moderate | 699 (59.4%) | 477 (40.6%) | 1176 (100.0%) |  |
| High | 174 (39.2%) | 270 (60.8%) | 444 (100.0%) |  |
| Elixhauser index |  |  |  | < 0.001 |
| Mean (SD) | 1.2 (5.5) | 5.0 (8.2) | 2.5 (6.8) |  |
| Elixhauser risk |  |  |  | < 0.001 |
| Low | 1831 (75.8%) | 586 (24.2%) | 2417 (100.0%) |  |
| Moderate | 422 (53.2%) | 371 (46.8%) | 793 (100.0%) |  |
| High | 251 (40.2%) | 373 (59.8%) | 624 (100.0%) |  |
| Elixhauser measure |  |  |  | < 0.001 |
| Mean (SD) | 1.4 (1.5) | 2.5 (1.7) | 1.8 (1.7) |  |
| Elix. measure risk |  |  |  | < 0.001 |
| Low | 1565 (78.2%) | 435 (21.8%) | 2000 (100.0%) |  |
| Moderate | 699 (55.6%) | 559 (44.4%) | 1258 (100.0%) |  |
| High | 240 (41.7%) | 336 (58.3%) | 576 (100.0%) |  |
| Queralt DxS index |  |  |  | < 0.001 |
| Mean (SD) | 10.9 (9.5) | 25.8 (15.5) | 16.0 (13.9) |  |
| Queralt DxS risk |  |  |  | < 0.001 |
| Low | 2136 (80.2%) | 528 (19.8%) | 2664 (100.0%) |  |
| Moderate | 271 (37.7%) | 448 (62.3%) | 719 (100.0%) |  |
| High | 97 (21.5%) | 354 (78.5%) | 451 (100.0%) |  |

## **Table S2.** Main demographic, clinical, and epidemiological characteristics of individuals admitted during the **second wave**

|  | **No critical illness** | **Critical illness** | **Total** | ***P*** |
| --- | --- | --- | --- | --- |
| Age |  |  |  | < 0.001 |
| Mean (SD) | 60.6 (17.5) | 66.5 (16.0) | 62.4 (17.3) |  |
| Age group |  |  |  | < 0.001 |
| 0 - 39 | 268 (83.0%) | 55 (17.0%) | 323 (100.0%) |  |
| 40 - 49 | 358 (78.9%) | 96 (21.1%) | 454 (100.0%) |  |
| 50 - 59 | 515 (72.8%) | 192 (27.2%) | 707 (100.0%) |  |
| 60 - 69 | 529 (69.4%) | 233 (30.6%) | 762 (100.0%) |  |
| 70 - 79 | 438 (65.3%) | 233 (34.7%) | 671 (100.0%) |  |
| 80 -> | 352 (58.9%) | 246 (41.1%) | 598 (100.0%) |  |
| Sex |  |  |  | < 0.001 |
| Men | 1426 (67.4%) | 691 (32.6%) | 2117 (100.0%) |  |
| Women | 1034 (74.0%) | 364 (26.0%) | 1398 (100.0%) |  |
| Hospital |  |  |  | < 0.001 |
| Arnau de Vilanova | 515 (74.7%) | 174 (25.3%) | 689 (100.0%) |  |
| Joan XXIII | 293 (81.6%) | 66 (18.4%) | 359 (100.0%) |  |
| Verge de la Cinta | 116 (73.4%) | 42 (26.6%) | 158 (100.0%) |  |
| Dr Trueta | 216 (60.8%) | 139 (39.2%) | 355 (100.0%) |  |
| Bellvitge | 316 (68.0%) | 149 (32.0%) | 465 (100.0%) |  |
| Germans Trias | 402 (62.8%) | 238 (37.2%) | 640 (100.0%) |  |
| Vall Hebron | 602 (70.9%) | 247 (29.1%) | 849 (100.0%) |  |
| Vaccine |  |  |  |  |
| No vaccine | 2460 (70.0%) | 1055 (30.0%) | 3515 (100.0%) |  |
| 1st dose | 0 (NaN%) | 0 (NaN%) | 0 (NaN%) |  |
| 2nd dose | 0 (NaN%) | 0 (NaN%) | 0 (NaN%) |  |
| 3rd dose | 0 (NaN%) | 0 (NaN%) | 0 (NaN%) |  |
| Wave |  |  |  | < 0.001 |
| 1st wave | 2460 (70.0%) | 1055 (30.0%) | 3515 (100.0%) |  |
| Charlson index |  |  |  | < 0.001 |
| Mean (SD) | 1.0 (1.5) | 1.4 (1.9) | 1.1 (1.6) |  |
| Charlson risk |  |  |  | < 0.001 |
| Low | 1318 (75.6%) | 425 (24.4%) | 1743 (100.0%) |  |
| Moderate | 832 (66.6%) | 417 (33.4%) | 1249 (100.0%) |  |
| High | 310 (59.3%) | 213 (40.7%) | 523 (100.0%) |  |
| Elixhauser index |  |  |  | < 0.001 |
| Mean (SD) | 1.5 (6.4) | 4.7 (8.9) | 2.5 (7.4) |  |
| Elixhauser risk |  |  |  | < 0.001 |
| Low | 1630 (77.6%) | 471 (22.4%) | 2101 (100.0%) |  |
| Moderate | 530 (63.1%) | 310 (36.9%) | 840 (100.0%) |  |
| High | 300 (52.3%) | 274 (47.7%) | 574 (100.0%) |  |
| Elixhauser measure |  |  |  | < 0.001 |
| Mean (SD) | 1.8 (1.7) | 2.6 (1.7) | 2.1 (1.7) |  |
| Elix. measure risk |  |  |  | < 0.001 |
| Low | 1232 (80.3%) | 303 (19.7%) | 1535 (100.0%) |  |
| Moderate | 848 (64.8%) | 461 (35.2%) | 1309 (100.0%) |  |
| High | 380 (56.6%) | 291 (43.4%) | 671 (100.0%) |  |
| Queralt DxS index |  |  |  | < 0.001 |
| Mean (SD) | 18.8 (11.0) | 32.8 (17.1) | 23.0 (14.6) |  |
| Queralt DxS risk |  |  |  | < 0.001 |
| Low | 1483 (88.4%) | 194 (11.6%) | 1677 (100.0%) |  |
| Moderate | 656 (62.2%) | 399 (37.8%) | 1055 (100.0%) |  |
| High | 321 (41.0%) | 462 (59.0%) | 783 (100.0%) |  |

## **Table S3.** Main demographic, clinical, and epidemiological characteristics of individuals admitted during the **third wave.**

|  | **No critical illness** | **Critical illness** | **Total** | ***P*** |
| --- | --- | --- | --- | --- |
| Age |  |  |  | < 0.001 |
| Mean (SD) | 62.7 (16.7) | 67.2 (15.3) | 64.3 (16.3) |  |
| Age group |  |  |  | < 0.001 |
| 0 - 39 | 156 (75.0%) | 52 (25.0%) | 208 (100.0%) |  |
| 40 - 49 | 255 (75.7%) | 82 (24.3%) | 337 (100.0%) |  |
| 50 - 59 | 388 (68.0%) | 183 (32.0%) | 571 (100.0%) |  |
| 60 - 69 | 456 (63.5%) | 262 (36.5%) | 718 (100.0%) |  |
| 70 - 79 | 415 (59.6%) | 281 (40.4%) | 696 (100.0%) |  |
| 80 -> | 314 (55.6%) | 251 (44.4%) | 565 (100.0%) |  |
| Sex |  |  |  | < 0.001 |
| Men | 1128 (60.6%) | 732 (39.4%) | 1860 (100.0%) |  |
| Women | 856 (69.3%) | 379 (30.7%) | 1235 (100.0%) |  |
| Hospital |  |  |  | < 0.001 |
| Arnau de Vilanova | 347 (71.1%) | 141 (28.9%) | 488 (100.0%) |  |
| Joan XXIII | 188 (70.1%) | 80 (29.9%) | 268 (100.0%) |  |
| Verge de la Cinta | 117 (77.5%) | 34 (22.5%) | 151 (100.0%) |  |
| Dr Trueta | 162 (54.9%) | 133 (45.1%) | 295 (100.0%) |  |
| Bellvitge | 295 (60.5%) | 193 (39.5%) | 488 (100.0%) |  |
| Germans Trias | 363 (53.9%) | 310 (46.1%) | 673 (100.0%) |  |
| Vall Hebron | 512 (69.9%) | 220 (30.1%) | 732 (100.0%) |  |
| Vaccine |  |  |  |  |
| No vaccine | 1945 (64.0%) | 1095 (36.0%) | 3040 (100.0%) |  |
| 1st dose | 38 (71.7%) | 15 (28.3%) | 53 (100.0%) |  |
| 2nd dose | 1 (50.0%) | 1 (50.0%) | 2 (100.0%) |  |
| 3rd dose | 0 (NaN%) | 0 (NaN%) | 0 (NaN%) |  |
| Wave |  |  |  | < 0.001 |
| 1st wave | 1984 (64.1%) | 1111 (35.9%) | 3095 (100.0%) |  |
| Charlson index |  |  |  | < 0.001 |
| Mean (SD) | 1.1 (1.6) | 1.4 (1.9) | 1.2 (1.7) |  |
| Charlson risk |  |  |  | < 0.001 |
| Low | 1015 (69.2%) | 452 (30.8%) | 1467 (100.0%) |  |
| Moderate | 700 (61.5%) | 439 (38.5%) | 1139 (100.0%) |  |
| High | 269 (55.0%) | 220 (45.0%) | 489 (100.0%) |  |
| Elixhauser index |  |  |  | < 0.001 |
| Mean (SD) | 1.6 (6.5) | 4.7 (8.9) | 2.7 (7.6) |  |
| Elixhauser risk |  |  |  | < 0.001 |
| Low | 1292 (71.5%) | 516 (28.5%) | 1808 (100.0%) |  |
| Moderate | 436 (60.6%) | 283 (39.4%) | 719 (100.0%) |  |
| High | 256 (45.1%) | 312 (54.9%) | 568 (100.0%) |  |
| Elixhauser measure |  |  |  | < 0.001 |
| Mean (SD) | 1.9 (1.7) | 2.6 (1.8) | 2.2 (1.7) |  |
| Elix. measure risk |  |  |  | < 0.001 |
| Low | 925 (73.5%) | 333 (26.5%) | 1258 (100.0%) |  |
| Moderate | 721 (61.7%) | 447 (38.3%) | 1168 (100.0%) |  |
| High | 338 (50.5%) | 331 (49.5%) | 669 (100.0%) |  |
| Queralt DxS index |  |  |  | < 0.001 |
| Mean (SD) | 19.9 (11.1) | 32.3 (15.9) | 24.4 (14.3) |  |
| Queralt DxS risk |  |  |  | < 0.001 |
| Low | 1101 (83.5%) | 218 (16.5%) | 1319 (100.0%) |  |
| Moderate | 585 (58.4%) | 417 (41.6%) | 1002 (100.0%) |  |
| High | 298 (38.5%) | 476 (61.5%) | 774 (100.0%) |  |

## **Table S4.** Main demographic, clinical, and epidemiological characteristics of individuals admitted during the **fourth wave.**

|  | **No critical illness** | **Critical illness** | **Total** | ***P*** |
| --- | --- | --- | --- | --- |
| Age |  |  |  | < 0.001 |
| Mean (SD) | 56.9 (15.4) | 61.3 (14.4) | 58.5 (15.2) |  |
| Age group |  |  |  | < 0.001 |
| 0 - 39 | 126 (71.6%) | 50 (28.4%) | 176 (100.0%) |  |
| 40 - 49 | 206 (71.3%) | 83 (28.7%) | 289 (100.0%) |  |
| 50 - 59 | 258 (64.5%) | 142 (35.5%) | 400 (100.0%) |  |
| 60 - 69 | 238 (57.3%) | 177 (42.7%) | 415 (100.0%) |  |
| 70 - 79 | 185 (57.1%) | 139 (42.9%) | 324 (100.0%) |  |
| 80 -> | 54 (48.6%) | 57 (51.4%) | 111 (100.0%) |  |
| Sex |  |  |  | < 0.001 |
| Men | 638 (59.2%) | 439 (40.8%) | 1077 (100.0%) |  |
| Women | 429 (67.2%) | 209 (32.8%) | 638 (100.0%) |  |
| Hospital |  |  |  | < 0.001 |
| Arnau de Vilanova | 289 (72.4%) | 110 (27.6%) | 399 (100.0%) |  |
| Joan XXIII | 67 (61.5%) | 42 (38.5%) | 109 (100.0%) |  |
| Verge de la Cinta | 53 (61.6%) | 33 (38.4%) | 86 (100.0%) |  |
| Dr Trueta | 83 (45.9%) | 98 (54.1%) | 181 (100.0%) |  |
| Bellvitge | 134 (61.2%) | 85 (38.8%) | 219 (100.0%) |  |
| Germans Trias | 147 (53.5%) | 128 (46.5%) | 275 (100.0%) |  |
| Vall Hebron | 294 (65.9%) | 152 (34.1%) | 446 (100.0%) |  |
| Vaccine |  |  |  |  |
| No vaccine | 886 (62.0%) | 543 (38.0%) | 1429 (100.0%) |  |
| 1st dose | 151 (61.9%) | 93 (38.1%) | 244 (100.0%) |  |
| 2nd dose | 30 (71.4%) | 12 (28.6%) | 42 (100.0%) |  |
| 3rd dose | 0 (NaN%) | 0 (NaN%) | 0 (NaN%) |  |
| Wave |  |  |  | < 0.001 |
| 1st wave | 1067 (62.2%) | 648 (37.8%) | 1715 (100.0%) |  |
| Charlson index |  |  |  | < 0.001 |
| Mean (SD) | 0.6 (1.1) | 1.1 (1.6) | 0.8 (1.4) |  |
| Charlson risk |  |  |  | < 0.001 |
| Low | 684 (67.5%) | 330 (32.5%) | 1014 (100.0%) |  |
| Moderate | 314 (57.5%) | 232 (42.5%) | 546 (100.0%) |  |
| High | 69 (44.5%) | 86 (55.5%) | 155 (100.0%) |  |
| Elixhauser index |  |  |  | < 0.001 |
| Mean (SD) | 0.9 (5.8) | 2.8 (8.4) | 1.6 (6.9) |  |
| Elixhauser risk |  |  |  | < 0.001 |
| Low | 767 (67.0%) | 378 (33.0%) | 1145 (100.0%) |  |
| Moderate | 176 (55.3%) | 142 (44.7%) | 318 (100.0%) |  |
| High | 124 (49.2%) | 128 (50.8%) | 252 (100.0%) |  |
| Elixhauser measure |  |  |  | < 0.001 |
| Mean (SD) | 1.5 (1.5) | 2.3 (1.7) | 1.8 (1.6) |  |
| Elix. measure risk |  |  |  | < 0.001 |
| Low | 611 (72.1%) | 236 (27.9%) | 847 (100.0%) |  |
| Moderate | 342 (55.1%) | 279 (44.9%) | 621 (100.0%) |  |
| High | 114 (46.2%) | 133 (53.8%) | 247 (100.0%) |  |
| Queralt DxS index |  |  |  | < 0.001 |
| Mean (SD) | 18.8 (10.6) | 31.5 (15.7) | 23.6 (14.2) |  |
| Queralt DxS risk |  |  |  | < 0.001 |
| Low | 649 (82.7%) | 136 (17.3%) | 785 (100.0%) |  |
| Moderate | 289 (56.4%) | 223 (43.6%) | 512 (100.0%) |  |
| High | 129 (30.9%) | 289 (69.1%) | 418 (100.0%) |  |

## **Table S5.** Main demographic, clinical, and epidemiological characteristics of individuals admitted during the **fifth wave.**

|  | **No critical illness** | **Critical illness** | **Total** | ***P*** |
| --- | --- | --- | --- | --- |
| Age |  |  |  | < 0.001 |
| Mean (SD) | 54.2 (21.0) | 58.8 (19.5) | 55.9 (20.5) |  |
| Age group |  |  |  | < 0.001 |
| 0 - 39 | 404 (71.5%) | 161 (28.5%) | 565 (100.0%) |  |
| 40 - 49 | 271 (65.1%) | 145 (34.9%) | 416 (100.0%) |  |
| 50 - 59 | 192 (58.0%) | 139 (42.0%) | 331 (100.0%) |  |
| 60 - 69 | 259 (57.8%) | 189 (42.2%) | 448 (100.0%) |  |
| 70 - 79 | 168 (56.9%) | 127 (43.1%) | 295 (100.0%) |  |
| 80 -> | 211 (58.1%) | 152 (41.9%) | 363 (100.0%) |  |
| Sex |  |  |  | 0.036 |
| Men | 888 (60.6%) | 578 (39.4%) | 1466 (100.0%) |  |
| Women | 617 (64.8%) | 335 (35.2%) | 952 (100.0%) |  |
| Hospital |  |  |  | < 0.001 |
| Arnau de Vilanova | 156 (66.4%) | 79 (33.6%) | 235 (100.0%) |  |
| Joan XXIII | 147 (72.4%) | 56 (27.6%) | 203 (100.0%) |  |
| Verge de la Cinta | 61 (64.2%) | 34 (35.8%) | 95 (100.0%) |  |
| Dr Trueta | 98 (46.2%) | 114 (53.8%) | 212 (100.0%) |  |
| Bellvitge | 342 (62.8%) | 203 (37.2%) | 545 (100.0%) |  |
| Germans Trias | 231 (51.9%) | 214 (48.1%) | 445 (100.0%) |  |
| Vall Hebron | 470 (68.8%) | 213 (31.2%) | 683 (100.0%) |  |
| Vaccine |  |  |  |  |
| No vaccine | 826 (62.2%) | 503 (37.8%) | 1329 (100.0%) |  |
| 1st dose | 277 (66.1%) | 142 (33.9%) | 419 (100.0%) |  |
| 2nd dose | 402 (60.0%) | 268 (40.0%) | 670 (100.0%) |  |
| 3rd dose | 0 (NaN%) | 0 (NaN%) | 0 (NaN%) |  |
| Wave |  |  |  | < 0.001 |
| 1st wave | 1505 (62.2%) | 913 (37.8%) | 2418 (100.0%) |  |
| Charlson index |  |  |  | 0.012 |
| Mean (SD) | 0.9 (1.5) | 1.1 (1.6) | 1.0 (1.5) |  |
| Charlson risk |  |  |  | < 0.001 |
| Low | 877 (65.5%) | 462 (34.5%) | 1339 (100.0%) |  |
| Moderate | 440 (59.4%) | 301 (40.6%) | 741 (100.0%) |  |
| High | 188 (55.6%) | 150 (44.4%) | 338 (100.0%) |  |
| Elixhauser index |  |  |  | < 0.001 |
| Mean (SD) | 1.8 (6.3) | 2.9 (7.6) | 2.2 (6.8) |  |
| Elixhauser risk |  |  |  | < 0.001 |
| Low | 993 (66.2%) | 507 (33.8%) | 1500 (100.0%) |  |
| Moderate | 319 (59.6%) | 216 (40.4%) | 535 (100.0%) |  |
| High | 193 (50.4%) | 190 (49.6%) | 383 (100.0%) |  |
| Elixhauser measure |  |  |  | < 0.001 |
| Mean (SD) | 1.6 (1.7) | 2.2 (1.7) | 1.8 (1.7) |  |
| Elix. measure risk |  |  |  | < 0.001 |
| Low | 844 (69.0%) | 379 (31.0%) | 1223 (100.0%) |  |
| Moderate | 452 (57.7%) | 332 (42.3%) | 784 (100.0%) |  |
| High | 209 (50.9%) | 202 (49.1%) | 411 (100.0%) |  |
| Queralt DxS index |  |  |  | < 0.001 |
| Mean (SD) | 18.0 (10.9) | 29.2 (14.8) | 22.2 (13.6) |  |
| Queralt DxS risk |  |  |  | < 0.001 |
| Low | 944 (79.0%) | 251 (21.0%) | 1195 (100.0%) |  |
| Moderate | 379 (54.5%) | 317 (45.5%) | 696 (100.0%) |  |
| High | 182 (34.5%) | 345 (65.5%) | 527 (100.0%) |  |

## **Table S6.** Main demographic, clinical, and epidemiological characteristics of individuals admitted during the **sixth wave.**

|  | **No critical illness** | **Critical illness** | **Total** | ***P*** |
| --- | --- | --- | --- | --- |
| Age |  |  |  | < 0.001 |
| Mean (SD) | 65.1 (20.8) | 68.2 (17.5) | 66.2 (19.8) |  |
| Age group |  |  |  | 0.002 |
| 0 - 39 | 203 (77.2%) | 60 (22.8%) | 263 (100.0%) |  |
| 40 - 49 | 155 (66.8%) | 77 (33.2%) | 232 (100.0%) |  |
| 50 - 59 | 248 (65.3%) | 132 (34.7%) | 380 (100.0%) |  |
| 60 - 69 | 438 (63.5%) | 252 (36.5%) | 690 (100.0%) |  |
| 70 - 79 | 445 (63.4%) | 257 (36.6%) | 702 (100.0%) |  |
| 80 -> | 505 (64.7%) | 275 (35.3%) | 780 (100.0%) |  |
| Sex |  |  |  | < 0.001 |
| Men | 1106 (62.5%) | 665 (37.5%) | 1771 (100.0%) |  |
| Women | 888 (69.6%) | 388 (30.4%) | 1276 (100.0%) |  |
| Hospital |  |  |  | < 0.001 |
| Arnau de Vilanova | 356 (66.5%) | 179 (33.5%) | 535 (100.0%) |  |
| Joan XXIII | 179 (71.0%) | 73 (29.0%) | 252 (100.0%) |  |
| Verge de la Cinta | 147 (73.9%) | 52 (26.1%) | 199 (100.0%) |  |
| Dr Trueta | 155 (54.4%) | 130 (45.6%) | 285 (100.0%) |  |
| Bellvitge | 303 (61.2%) | 192 (38.8%) | 495 (100.0%) |  |
| Germans Trias | 282 (55.4%) | 227 (44.6%) | 509 (100.0%) |  |
| Vall Hebron | 572 (74.1%) | 200 (25.9%) | 772 (100.0%) |  |
| Vaccine |  |  |  | < 0.001 |
| No vaccine | 567 (59.7%) | 382 (40.3%) | 949 (100.0%) |  |
| 1st dose | 91 (61.9%) | 56 (38.1%) | 147 (100.0%) |  |
| 2nd dose | 617 (67.0%) | 304 (33.0%) | 921 (100.0%) |  |
| 3rd dose | 719 (69.8%) | 311 (30.2%) | 1030 (100.0%) |  |
| Wave |  |  |  | < 0.001 |
| 1st wave | 1994 (65.4%) | 1053 (34.6%) | 3047 (100.0%) |  |
| Charlson index |  |  |  | 0.589 |
| Mean (SD) | 1.7 (2.0) | 1.8 (1.9) | 1.7 (2.0) |  |
| Charlson risk |  |  |  | 0.183 |
| Low | 663 (65.1%) | 355 (34.9%) | 1018 (100.0%) |  |
| Moderate | 824 (67.2%) | 403 (32.8%) | 1227 (100.0%) |  |
| High | 507 (63.2%) | 295 (36.8%) | 802 (100.0%) |  |
| Elixhauser index |  |  |  | < 0.001 |
| Mean (SD) | 4.3 (8.1) | 5.8 (9.2) | 4.8 (8.5) |  |
| Elixhauser risk |  |  |  | < 0.001 |
| Low | 928 (68.4%) | 428 (31.6%) | 1356 (100.0%) |  |
| Moderate | 628 (68.3%) | 292 (31.7%) | 920 (100.0%) |  |
| High | 438 (56.8%) | 333 (43.2%) | 771 (100.0%) |  |
| Elixhauser measure |  |  |  | < 0.001 |
| Mean (SD) | 2.6 (1.9) | 2.9 (1.9) | 2.7 (1.9) |  |
| Elix. measure risk |  |  |  | < 0.001 |
| Low | 645 (70.3%) | 273 (29.7%) | 918 (100.0%) |  |
| Moderate | 780 (65.9%) | 404 (34.1%) | 1184 (100.0%) |  |
| High | 569 (60.2%) | 376 (39.8%) | 945 (100.0%) |  |
| Queralt DxS index |  |  |  | < 0.001 |
| Mean (SD) | 19.2 (12.4) | 30.8 (18.8) | 23.2 (15.9) |  |
| Queralt DxS risk |  |  |  | < 0.001 |
| Low | 1135 (77.6%) | 328 (22.4%) | 1463 (100.0%) |  |
| Moderate | 569 (66.1%) | 292 (33.9%) | 861 (100.0%) |  |
| High | 290 (40.1%) | 433 (59.9%) | 723 (100.0%) |  |

## **Table S7.** Main demographic, clinical, and epidemiological characteristics of individuals admitted during the **seventh wave.**

|  | **No critical illness** | **Critical illness** | **Total** | ***P*** |
| --- | --- | --- | --- | --- |
| Age |  |  |  | 0.012 |
| Mean (SD) | 72.8 (20.5) | 75.8 (18.4) | 73.3 (20.2) |  |
| Age group |  |  |  | 0.244 |
| 0 - 39 | 116 (87.9%) | 16 (12.1%) | 132 (100.0%) |  |
| 40 - 49 | 68 (89.5%) | 8 (10.5%) | 76 (100.0%) |  |
| 50 - 59 | 107 (84.3%) | 20 (15.7%) | 127 (100.0%) |  |
| 60 - 69 | 189 (80.1%) | 47 (19.9%) | 236 (100.0%) |  |
| 70 - 79 | 430 (83.3%) | 86 (16.7%) | 516 (100.0%) |  |
| 80 -> | 780 (82.0%) | 171 (18.0%) | 951 (100.0%) |  |
| Sex |  |  |  | 0.265 |
| Men | 965 (82.1%) | 210 (17.9%) | 1175 (100.0%) |  |
| Women | 725 (84.0%) | 138 (16.0%) | 863 (100.0%) |  |
| Hospital |  |  |  | < 0.001 |
| Arnau de Vilanova | 309 (81.3%) | 71 (18.7%) | 380 (100.0%) |  |
| Joan XXIII | 167 (87.0%) | 25 (13.0%) | 192 (100.0%) |  |
| Verge de la Cinta | 89 (89.0%) | 11 (11.0%) | 100 (100.0%) |  |
| Dr Trueta | 99 (74.4%) | 34 (25.6%) | 133 (100.0%) |  |
| Bellvitge | 261 (81.6%) | 59 (18.4%) | 320 (100.0%) |  |
| Germans Trias | 275 (76.8%) | 83 (23.2%) | 358 (100.0%) |  |
| Vall Hebron | 490 (88.3%) | 65 (11.7%) | 555 (100.0%) |  |
| Vaccine |  |  |  | 0.859 |
| No vaccine | 235 (81.3%) | 54 (18.7%) | 289 (100.0%) |  |
| 1st dose | 25 (80.6%) | 6 (19.4%) | 31 (100.0%) |  |
| 2nd dose | 148 (83.1%) | 30 (16.9%) | 178 (100.0%) |  |
| 3rd dose | 1282 (83.2%) | 258 (16.8%) | 1540 (100.0%) |  |
| Wave |  |  |  | < 0.001 |
| 1st wave | 1690 (82.9%) | 348 (17.1%) | 2038 (100.0%) |  |
| Charlson index |  |  |  | 0.012 |
| Mean (SD) | 2.2 (2.1) | 2.5 (2.3) | 2.3 (2.1) |  |
| Charlson risk |  |  |  | 0.060 |
| Low | 354 (86.3%) | 56 (13.7%) | 410 (100.0%) |  |
| Moderate | 745 (83.1%) | 152 (16.9%) | 897 (100.0%) |  |
| High | 591 (80.8%) | 140 (19.2%) | 731 (100.0%) |  |
| Elixhauser index |  |  |  | < 0.001 |
| Mean (SD) | 6.2 (8.1) | 10.5 (10.4) | 6.9 (8.7) |  |
| Elixhauser risk |  |  |  | < 0.001 |
| Low | 536 (87.6%) | 76 (12.4%) | 612 (100.0%) |  |
| Moderate | 655 (87.9%) | 90 (12.1%) | 745 (100.0%) |  |
| High | 499 (73.3%) | 182 (26.7%) | 681 (100.0%) |  |
| Elixhauser measure |  |  |  | < 0.001 |
| Mean (SD) | 3.0 (1.8) | 3.7 (1.9) | 3.1 (1.8) |  |
| Elix. measure risk |  |  |  | < 0.001 |
| Low | 368 (88.9%) | 46 (11.1%) | 414 (100.0%) |  |
| Moderate | 717 (85.7%) | 120 (14.3%) | 837 (100.0%) |  |
| High | 605 (76.9%) | 182 (23.1%) | 787 (100.0%) |  |
| Queralt DxS index |  |  |  | < 0.001 |
| Mean (SD) | 20.4 (12.5) | 37.7 (21.1) | 23.3 (15.8) |  |
| Queralt DxS risk |  |  |  | < 0.001 |
| Low | 904 (93.8%) | 60 (6.2%) | 964 (100.0%) |  |
| Moderate | 509 (84.0%) | 97 (16.0%) | 606 (100.0%) |  |
| High | 277 (59.2%) | 191 (40.8%) | 468 (100.0%) |  |

# Supplementary Tables: Adjusted models of age and sex

## **Table S8.** Effect of age (coefficients and odds ratios for age groups) and sex on critical illness using multiple logistic regressions. **First wave**.

The base model included only age, sex, and hospital, whereas the other models were built by adjusting the base model for each of the multimorbidity measures: the Charlson index, the Elixhauser index, the unweighted count of Elixhauser diagnoses (Elixhauser measure), and the Queralt DxS.

|  |  | **Coefficients** | | | **OR** | |
| --- | --- | --- | --- | --- | --- | --- |
|  |  | Estimate | St. dev. | p-value | Estimate | 95% CI |
| **Base model** |  |  |  |  |  |  |
| Age 40 - 49 |  | 0.219 | 0.190 | 0.251 | 1.244 | 0.857 - 1.807 |
| Age 50 - 59 |  | 0.594 | 0.174 | < 0.001 | 1.811 | 1.289 - 2.545 |
| Age 60 - 69 |  | 1.099 | 0.171 | < 0.001 | 3.000 | 2.147 - 4.192 |
| Age 70 - 79 |  | 1.513 | 0.170 | < 0.001 | 4.540 | 3.252 - 6.338 |
| Age >=80 |  | 2.250 | 0.182 | < 0.001 | 9.487 | 6.644 - 13.544 |
| Women |  | -0.629 | 0.077 | < 0.001 | 0.533 | 0.459 - 0.619 |
| **Charlson index** |  |  |  |  |  |  |
| Age 40 - 49 |  | 0.195 | 0.190 | 0.305 | 1.216 | 0.837 - 1.766 |
| Age 50 - 59 |  | 0.543 | 0.174 | 0.002 | 1.722 | 1.224 - 2.421 |
| Age 60 - 69 |  | 1.002 | 0.172 | < 0.001 | 2.723 | 1.944 - 3.814 |
| Age 70 - 79 |  | 1.354 | 0.173 | < 0.001 | 3.872 | 2.759 - 5.436 |
| Age >=80 |  | 2.009 | 0.187 | < 0.001 | 7.457 | 5.167 - 10.764 |
| Women |  | -0.595 | 0.077 | < 0.001 | 0.552 | 0.474 - 0.641 |
| **Elixhauser index** |  |  |  |  |  |  |
| Age 40 - 49 |  | 0.227 | 0.192 | 0.236 | 1.255 | 0.862 - 1.827 |
| Age 50 - 59 |  | 0.555 | 0.175 | 0.002 | 1.743 | 1.237 - 2.455 |
| Age 60 - 69 |  | 0.969 | 0.173 | < 0.001 | 2.634 | 1.878 - 3.695 |
| Age 70 - 79 |  | 1.308 | 0.173 | < 0.001 | 3.699 | 2.637 - 5.19 |
| Age >=80 |  | 1.965 | 0.185 | < 0.001 | 7.136 | 4.968 - 10.25 |
| Women |  | -0.532 | 0.078 | < 0.001 | 0.588 | 0.504 - 0.685 |
| **Elixhauser measure** |  |  |  |  |  |  |
| Age 40 - 49 |  | 0.121 | 0.192 | 0.527 | 1.129 | 0.775 - 1.644 |
| Age 50 - 59 |  | 0.407 | 0.176 | 0.020 | 1.502 | 1.065 - 2.12 |
| Age 60 - 69 |  | 0.779 | 0.174 | < 0.001 | 2.180 | 1.548 - 3.068 |
| Age 70 - 79 |  | 1.015 | 0.177 | < 0.001 | 2.760 | 1.951 - 3.905 |
| Age >=80 |  | 1.629 | 0.190 | < 0.001 | 5.100 | 3.512 - 7.406 |
| Women |  | -0.617 | 0.078 | < 0.001 | 0.540 | 0.463 - 0.629 |
| **Queralt DxS index** |  |  |  |  |  |  |
| Age 40 - 49 |  | 0.201 | 0.209 | 0.336 | 1.222 | 0.812 - 1.84 |
| Age 50 - 59 |  | 0.298 | 0.193 | 0.122 | 1.347 | 0.924 - 1.964 |
| Age 60 - 69 |  | 0.508 | 0.191 | 0.008 | 1.663 | 1.143 - 2.419 |
| Age 70 - 79 |  | 0.688 | 0.192 | < 0.001 | 1.991 | 1.368 - 2.898 |
| Age >=80 |  | 1.024 | 0.205 | < 0.001 | 2.785 | 1.862 - 4.166 |
| Women |  | -0.552 | 0.086 | < 0.001 | 0.576 | 0.486 - 0.682 |

## **Table S9.** Effect of age (coefficients and odds ratios for age groups) and sex on critical illness using multiple logistic regressions. **Second wave**.

The base model included only age, sex, and hospital, whereas the other models were built by adjusting the base model for each of the multimorbidity measures: the Charlson index, the Elixhauser index, the unweighted count of Elixhauser diagnoses (Elixhauser measure), and the Queralt DxS.

|  |  | **Coefficients** | | | **OR** | |
| --- | --- | --- | --- | --- | --- | --- |
|  |  | Estimate | St. dev. | p-value | Estimate | 95% CI |
| **Base model** |  |  |  |  |  |  |
| Age 40 - 49 |  | 0.238 | 0.189 | 0.208 | 1.269 | 0.876 - 1.839 |
| Age 50 - 59 |  | 0.595 | 0.173 | < 0.001 | 1.813 | 1.293 - 2.542 |
| Age 60 - 69 |  | 0.786 | 0.170 | < 0.001 | 2.195 | 1.573 - 3.063 |
| Age 70 - 79 |  | 0.998 | 0.171 | < 0.001 | 2.713 | 1.939 - 3.796 |
| Age >=80 |  | 1.287 | 0.173 | < 0.001 | 3.620 | 2.577 - 5.086 |
| Women |  | -0.400 | 0.079 | < 0.001 | 0.671 | 0.574 - 0.783 |
| **Charlson index** |  |  |  |  |  |  |
| Age 40 - 49 |  | 0.230 | 0.189 | 0.225 | 1.258 | 0.868 - 1.824 |
| Age 50 - 59 |  | 0.569 | 0.173 | < 0.001 | 1.767 | 1.26 - 2.479 |
| Age 60 - 69 |  | 0.705 | 0.171 | < 0.001 | 2.025 | 1.448 - 2.832 |
| Age 70 - 79 |  | 0.860 | 0.175 | < 0.001 | 2.364 | 1.679 - 3.328 |
| Age >=80 |  | 1.115 | 0.178 | < 0.001 | 3.049 | 2.151 - 4.322 |
| Women |  | -0.387 | 0.079 | < 0.001 | 0.679 | 0.581 - 0.793 |
| **Elixhauser index** |  |  |  |  |  |  |
| Age 40 - 49 |  | 0.271 | 0.191 | 0.154 | 1.312 | 0.903 - 1.906 |
| Age 50 - 59 |  | 0.615 | 0.174 | < 0.001 | 1.850 | 1.316 - 2.601 |
| Age 60 - 69 |  | 0.755 | 0.171 | < 0.001 | 2.127 | 1.52 - 2.976 |
| Age 70 - 79 |  | 0.857 | 0.174 | < 0.001 | 2.356 | 1.676 - 3.311 |
| Age >=80 |  | 1.079 | 0.177 | < 0.001 | 2.942 | 2.081 - 4.159 |
| Women |  | -0.342 | 0.080 | < 0.001 | 0.711 | 0.607 - 0.831 |
| **Elixhauser measure** |  |  |  |  |  |  |
| Age 40 - 49 |  | 0.178 | 0.190 | 0.349 | 1.195 | 0.823 - 1.736 |
| Age 50 - 59 |  | 0.471 | 0.174 | 0.007 | 1.601 | 1.139 - 2.252 |
| Age 60 - 69 |  | 0.538 | 0.173 | 0.002 | 1.713 | 1.219 - 2.407 |
| Age 70 - 79 |  | 0.613 | 0.178 | < 0.001 | 1.847 | 1.302 - 2.62 |
| Age >=80 |  | 0.800 | 0.184 | < 0.001 | 2.225 | 1.552 - 3.19 |
| Women |  | -0.427 | 0.080 | < 0.001 | 0.652 | 0.558 - 0.763 |
| **Queralt DxS index** |  |  |  |  |  |  |
| Age 40 - 49 |  | 0.141 | 0.209 | 0.500 | 1.151 | 0.765 - 1.733 |
| Age 50 - 59 |  | 0.321 | 0.192 | 0.094 | 1.378 | 0.947 - 2.007 |
| Age 60 - 69 |  | 0.294 | 0.190 | 0.123 | 1.341 | 0.924 - 1.948 |
| Age 70 - 79 |  | 0.221 | 0.194 | 0.255 | 1.248 | 0.852 - 1.826 |
| Age >=80 |  | 0.244 | 0.199 | 0.220 | 1.277 | 0.864 - 1.886 |
| Women |  | -0.351 | 0.087 | < 0.001 | 0.704 | 0.594 - 0.835 |

## **Table S10.** Effect of age (coefficients and odds ratios for age groups) and sex on critical illness using multiple logistic regressions. **Third wave**.

The base model included only age, sex, and hospital, whereas the other models were built by adjusting the base model for each of the multimorbidity measures: the Charlson index, the Elixhauser index, the unweighted count of Elixhauser diagnoses (Elixhauser measure), and the Queralt DxS.

|  |  | **Coefficients** | | | **OR** | |
| --- | --- | --- | --- | --- | --- | --- |
|  |  | Estimate | St. dev. | p-value | Estimate | 95% CI |
| **Base model** |  |  |  |  |  |  |
| Age 40 - 49 |  | -0.056 | 0.208 | 0.786 | 0.945 | 0.629 - 1.42 |
| Age 50 - 59 |  | 0.382 | 0.187 | 0.041 | 1.466 | 1.016 - 2.115 |
| Age 60 - 69 |  | 0.591 | 0.181 | 0.001 | 1.805 | 1.266 - 2.574 |
| Age 70 - 79 |  | 0.782 | 0.181 | < 0.001 | 2.187 | 1.533 - 3.12 |
| Age >=80 |  | 0.922 | 0.185 | < 0.001 | 2.515 | 1.75 - 3.615 |
| Women |  | -0.482 | 0.081 | < 0.001 | 0.618 | 0.527 - 0.724 |
| **Charlson index** |  |  |  |  |  |  |
| Age 40 - 49 |  | -0.060 | 0.208 | 0.771 | 0.941 | 0.627 - 1.414 |
| Age 50 - 59 |  | 0.364 | 0.187 | 0.052 | 1.440 | 0.998 - 2.077 |
| Age 60 - 69 |  | 0.552 | 0.182 | 0.002 | 1.737 | 1.216 - 2.481 |
| Age 70 - 79 |  | 0.714 | 0.184 | < 0.001 | 2.043 | 1.424 - 2.93 |
| Age >=80 |  | 0.837 | 0.189 | < 0.001 | 2.310 | 1.594 - 3.346 |
| Women |  | -0.463 | 0.081 | < 0.001 | 0.629 | 0.537 - 0.738 |
| **Elixhauser index** |  |  |  |  |  |  |
| Age 40 - 49 |  | -0.048 | 0.208 | 0.817 | 0.953 | 0.634 - 1.433 |
| Age 50 - 59 |  | 0.344 | 0.188 | 0.067 | 1.410 | 0.976 - 2.037 |
| Age 60 - 69 |  | 0.513 | 0.182 | 0.005 | 1.670 | 1.169 - 2.386 |
| Age 70 - 79 |  | 0.619 | 0.183 | < 0.001 | 1.857 | 1.297 - 2.66 |
| Age >=80 |  | 0.691 | 0.188 | < 0.001 | 1.997 | 1.381 - 2.886 |
| Women |  | -0.433 | 0.082 | < 0.001 | 0.648 | 0.552 - 0.761 |
| **Elixhauser measure** |  |  |  |  |  |  |
| Age 40 - 49 |  | -0.086 | 0.208 | 0.678 | 0.917 | 0.61 - 1.38 |
| Age 50 - 59 |  | 0.287 | 0.188 | 0.127 | 1.332 | 0.921 - 1.927 |
| Age 60 - 69 |  | 0.387 | 0.184 | 0.036 | 1.472 | 1.026 - 2.112 |
| Age 70 - 79 |  | 0.454 | 0.188 | 0.016 | 1.574 | 1.089 - 2.274 |
| Age >=80 |  | 0.520 | 0.194 | 0.007 | 1.683 | 1.15 - 2.462 |
| Women |  | -0.467 | 0.081 | < 0.001 | 0.627 | 0.534 - 0.735 |
| **Queralt DxS index** |  |  |  |  |  |  |
| Age 40 - 49 |  | -0.190 | 0.225 | 0.399 | 0.827 | 0.532 - 1.286 |
| Age 50 - 59 |  | 0.087 | 0.204 | 0.671 | 1.090 | 0.731 - 1.626 |
| Age 60 - 69 |  | 0.066 | 0.199 | 0.739 | 1.068 | 0.724 - 1.577 |
| Age 70 - 79 |  | 0.003 | 0.201 | 0.988 | 1.003 | 0.676 - 1.488 |
| Age >=80 |  | -0.091 | 0.208 | 0.662 | 0.913 | 0.608 - 1.372 |
| Women |  | -0.404 | 0.088 | < 0.001 | 0.667 | 0.561 - 0.793 |

## **Table S11.** Effect of age (coefficients and odds ratios for age groups) and sex on critical illness using multiple logistic regressions. **Fourth wave**.

The base model included only age, sex, and hospital, whereas the other models were built by adjusting the base model for vaccination status and each of the multimorbidity measures: the Charlson index, the Elixhauser index, the unweighted count of Elixhauser diagnoses (Elixhauser measure), and the Queralt DxS.

|  |  | **Coefficients** | | | **OR** | |
| --- | --- | --- | --- | --- | --- | --- |
|  |  | Estimate | St. dev. | p-value | Estimate | 95% CI |
| **Base model** |  |  |  |  |  |  |
| Age 40 - 49 |  | 0.099 | 0.216 | 0.645 | 1.104 | 0.724 - 1.686 |
| Age 50 - 59 |  | 0.365 | 0.201 | 0.070 | 1.440 | 0.971 - 2.137 |
| Age 60 - 69 |  | 0.830 | 0.202 | < 0.001 | 2.294 | 1.543 - 3.411 |
| Age 70 - 79 |  | 0.836 | 0.208 | < 0.001 | 2.308 | 1.534 - 3.472 |
| Age >=80 |  | 1.275 | 0.272 | < 0.001 | 3.578 | 2.101 - 6.094 |
| Women |  | -0.372 | 0.108 | < 0.001 | 0.689 | 0.557 - 0.852 |
| **Charlson index** |  |  |  |  |  |  |
| Age 40 - 49 |  | 0.040 | 0.216 | 0.852 | 1.041 | 0.681 - 1.591 |
| Age 50 - 59 |  | 0.286 | 0.202 | 0.158 | 1.331 | 0.895 - 1.977 |
| Age 60 - 69 |  | 0.701 | 0.205 | < 0.001 | 2.015 | 1.35 - 3.009 |
| Age 70 - 79 |  | 0.606 | 0.214 | 0.005 | 1.834 | 1.206 - 2.788 |
| Age >=80 |  | 1.011 | 0.278 | < 0.001 | 2.749 | 1.595 - 4.738 |
| Women |  | -0.349 | 0.109 | 0.001 | 0.705 | 0.569 - 0.874 |
| **Elixhauser index** |  |  |  |  |  |  |
| Age 40 - 49 |  | 0.098 | 0.216 | 0.652 | 1.103 | 0.722 - 1.685 |
| Age 50 - 59 |  | 0.357 | 0.202 | 0.077 | 1.429 | 0.962 - 2.123 |
| Age 60 - 69 |  | 0.786 | 0.203 | < 0.001 | 2.194 | 1.473 - 3.267 |
| Age 70 - 79 |  | 0.755 | 0.210 | < 0.001 | 2.127 | 1.409 - 3.21 |
| Age >=80 |  | 1.120 | 0.275 | < 0.001 | 3.065 | 1.788 - 5.251 |
| Women |  | -0.335 | 0.109 | 0.002 | 0.715 | 0.577 - 0.886 |
| **Elixhauser measure** |  |  |  |  |  |  |
| Age 40 - 49 |  | 0.041 | 0.217 | 0.850 | 1.042 | 0.681 - 1.595 |
| Age 50 - 59 |  | 0.172 | 0.205 | 0.400 | 1.188 | 0.795 - 1.775 |
| Age 60 - 69 |  | 0.572 | 0.207 | 0.006 | 1.772 | 1.18 - 2.66 |
| Age 70 - 79 |  | 0.395 | 0.219 | 0.072 | 1.484 | 0.966 - 2.279 |
| Age >=80 |  | 0.736 | 0.284 | 0.010 | 2.088 | 1.196 - 3.644 |
| Women |  | -0.373 | 0.110 | < 0.001 | 0.689 | 0.555 - 0.855 |
| **Queralt DxS index** |  |  |  |  |  |  |
| Age 40 - 49 |  | -0.058 | 0.235 | 0.805 | 0.944 | 0.595 - 1.496 |
| Age 50 - 59 |  | -0.095 | 0.223 | 0.668 | 0.909 | 0.588 - 1.406 |
| Age 60 - 69 |  | 0.215 | 0.225 | 0.339 | 1.240 | 0.798 - 1.926 |
| Age 70 - 79 |  | 0.015 | 0.234 | 0.949 | 1.015 | 0.642 - 1.605 |
| Age >=80 |  | 0.131 | 0.310 | 0.672 | 1.140 | 0.621 - 2.092 |
| Women |  | -0.346 | 0.123 | 0.005 | 0.708 | 0.556 - 0.9 |

## **Table S12.** Effect of age (coefficients and odds ratios for age groups) and sex on critical illness using multiple logistic regressions. **Fifth wave**.

The base model included only age, sex, and hospital, whereas the other models were built by adjusting the base model for vaccination status and each of the multimorbidity measures: the Charlson index, the Elixhauser index, the unweighted count of Elixhauser diagnoses (Elixhauser measure), and the Queralt DxS.

|  |  | **Coefficients** | | | **OR** | |
| --- | --- | --- | --- | --- | --- | --- |
|  |  | Estimate | St. dev. | p-value | Estimate | 95% CI |
| **Base model** |  |  |  |  |  |  |
| Age 40 - 49 |  | 0.367 | 0.142 | 0.010 | 1.444 | 1.092 - 1.909 |
| Age 50 - 59 |  | 0.601 | 0.150 | < 0.001 | 1.825 | 1.359 - 2.449 |
| Age 60 - 69 |  | 0.762 | 0.145 | < 0.001 | 2.142 | 1.614 - 2.844 |
| Age 70 - 79 |  | 0.866 | 0.168 | < 0.001 | 2.378 | 1.712 - 3.303 |
| Age >=80 |  | 0.785 | 0.176 | < 0.001 | 2.192 | 1.554 - 3.091 |
| Women |  | -0.224 | 0.089 | 0.012 | 0.799 | 0.671 - 0.952 |
| **Charlson index** |  |  |  |  |  |  |
| Age 40 - 49 |  | 0.367 | 0.142 | 0.010 | 1.443 | 1.092 - 1.907 |
| Age 50 - 59 |  | 0.597 | 0.151 | < 0.001 | 1.816 | 1.352 - 2.441 |
| Age 60 - 69 |  | 0.754 | 0.146 | < 0.001 | 2.126 | 1.596 - 2.832 |
| Age 70 - 79 |  | 0.854 | 0.172 | < 0.001 | 2.348 | 1.677 - 3.289 |
| Age >=80 |  | 0.773 | 0.179 | < 0.001 | 2.167 | 1.527 - 3.076 |
| Women |  | -0.223 | 0.089 | 0.013 | 0.800 | 0.672 - 0.953 |
| **Elixhauser index** |  |  |  |  |  |  |
| Age 40 - 49 |  | 0.364 | 0.142 | 0.011 | 1.439 | 1.089 - 1.902 |
| Age 50 - 59 |  | 0.587 | 0.150 | < 0.001 | 1.799 | 1.339 - 2.416 |
| Age 60 - 69 |  | 0.733 | 0.145 | < 0.001 | 2.081 | 1.565 - 2.767 |
| Age 70 - 79 |  | 0.820 | 0.170 | < 0.001 | 2.270 | 1.629 - 3.165 |
| Age >=80 |  | 0.731 | 0.178 | < 0.001 | 2.078 | 1.467 - 2.944 |
| Women |  | -0.209 | 0.090 | 0.019 | 0.811 | 0.681 - 0.967 |
| **Elixhauser measure** |  |  |  |  |  |  |
| Age 40 - 49 |  | 0.305 | 0.143 | 0.033 | 1.357 | 1.025 - 1.797 |
| Age 50 - 59 |  | 0.433 | 0.154 | 0.005 | 1.542 | 1.141 - 2.084 |
| Age 60 - 69 |  | 0.515 | 0.151 | < 0.001 | 1.674 | 1.245 - 2.25 |
| Age 70 - 79 |  | 0.520 | 0.178 | 0.003 | 1.682 | 1.187 - 2.383 |
| Age >=80 |  | 0.393 | 0.188 | 0.036 | 1.481 | 1.025 - 2.141 |
| Women |  | -0.227 | 0.090 | 0.012 | 0.797 | 0.669 - 0.951 |
| **Queralt DxS index** |  |  |  |  |  |  |
| Age 40 - 49 |  | 0.208 | 0.152 | 0.171 | 1.231 | 0.914 - 1.657 |
| Age 50 - 59 |  | 0.345 | 0.162 | 0.033 | 1.412 | 1.028 - 1.938 |
| Age 60 - 69 |  | 0.205 | 0.158 | 0.194 | 1.228 | 0.901 - 1.674 |
| Age 70 - 79 |  | 0.179 | 0.185 | 0.334 | 1.196 | 0.832 - 1.72 |
| Age >=80 |  | -0.097 | 0.197 | 0.623 | 0.908 | 0.616 - 1.336 |
| Women |  | -0.140 | 0.097 | 0.149 | 0.870 | 0.72 - 1.051 |

## **Table S13.** Effect of age (coefficients and odds ratios for age groups) and sex on critical illness using multiple logistic regressions. **Sixth wave**.

The base model included only age, sex, and hospital, whereas the other models were built by adjusting the base model for vaccination status and each of the multimorbidity measures: the Charlson index, the Elixhauser index, the unweighted count of Elixhauser diagnoses (Elixhauser measure), and the Queralt DxS.

|  |  | **Coefficients** | | | **OR** | |
| --- | --- | --- | --- | --- | --- | --- |
|  |  | Estimate | St. dev. | p-value | Estimate | 95% CI |
| **Base model** |  |  |  |  |  |  |
| Age 40 - 49 |  | 0.647 | 0.208 | 0.002 | 1.910 | 1.27 - 2.871 |
| Age 50 - 59 |  | 0.729 | 0.188 | < 0.001 | 2.074 | 1.434 - 3 |
| Age 60 - 69 |  | 0.923 | 0.175 | < 0.001 | 2.516 | 1.786 - 3.545 |
| Age 70 - 79 |  | 0.968 | 0.177 | < 0.001 | 2.633 | 1.862 - 3.725 |
| Age >=80 |  | 1.015 | 0.179 | < 0.001 | 2.758 | 1.942 - 3.918 |
| Women |  | -0.327 | 0.081 | < 0.001 | 0.721 | 0.616 - 0.845 |
| **Charlson index** |  |  |  |  |  |  |
| Age 40 - 49 |  | 0.643 | 0.208 | 0.002 | 1.902 | 1.265 - 2.86 |
| Age 50 - 59 |  | 0.719 | 0.189 | < 0.001 | 2.052 | 1.417 - 2.969 |
| Age 60 - 69 |  | 0.909 | 0.176 | < 0.001 | 2.481 | 1.759 - 3.5 |
| Age 70 - 79 |  | 0.945 | 0.179 | < 0.001 | 2.572 | 1.812 - 3.651 |
| Age >=80 |  | 0.990 | 0.181 | < 0.001 | 2.691 | 1.887 - 3.838 |
| Women |  | -0.324 | 0.081 | < 0.001 | 0.723 | 0.618 - 0.847 |
| **Elixhauser index** |  |  |  |  |  |  |
| Age 40 - 49 |  | 0.680 | 0.208 | 0.001 | 1.973 | 1.311 - 2.97 |
| Age 50 - 59 |  | 0.728 | 0.189 | < 0.001 | 2.071 | 1.431 - 2.997 |
| Age 60 - 69 |  | 0.907 | 0.175 | < 0.001 | 2.476 | 1.756 - 3.491 |
| Age 70 - 79 |  | 0.907 | 0.178 | < 0.001 | 2.476 | 1.748 - 3.508 |
| Age >=80 |  | 0.931 | 0.180 | < 0.001 | 2.537 | 1.782 - 3.612 |
| Women |  | -0.303 | 0.081 | < 0.001 | 0.739 | 0.63 - 0.866 |
| **Elixhauser measure** |  |  |  |  |  |  |
| Age 40 - 49 |  | 0.601 | 0.209 | 0.004 | 1.825 | 1.212 - 2.746 |
| Age 50 - 59 |  | 0.621 | 0.190 | 0.001 | 1.861 | 1.282 - 2.701 |
| Age 60 - 69 |  | 0.791 | 0.177 | < 0.001 | 2.205 | 1.557 - 3.121 |
| Age 70 - 79 |  | 0.779 | 0.182 | < 0.001 | 2.178 | 1.525 - 3.111 |
| Age >=80 |  | 0.805 | 0.185 | < 0.001 | 2.237 | 1.557 - 3.214 |
| Women |  | -0.336 | 0.081 | < 0.001 | 0.715 | 0.61 - 0.838 |
| **Queralt DxS index** |  |  |  |  |  |  |
| Age 40 - 49 |  | 0.549 | 0.220 | 0.013 | 1.731 | 1.124 - 2.667 |
| Age 50 - 59 |  | 0.447 | 0.200 | 0.026 | 1.563 | 1.056 - 2.313 |
| Age 60 - 69 |  | 0.566 | 0.186 | 0.002 | 1.762 | 1.224 - 2.535 |
| Age 70 - 79 |  | 0.497 | 0.189 | 0.008 | 1.644 | 1.136 - 2.379 |
| Age >=80 |  | 0.323 | 0.193 | 0.094 | 1.381 | 0.946 - 2.017 |
| Women |  | -0.273 | 0.086 | 0.002 | 0.761 | 0.643 - 0.902 |

## **Table S14.** Effect of age (coefficients and odds ratios for age groups) and sex on critical illness using multiple logistic regressions. **Seventh wave**.

The base model included only age, sex, and hospital, whereas the other models were built by adjusting the base model for vaccination status and each of the multimorbidity measures: the Charlson index, the Elixhauser index, the unweighted count of Elixhauser diagnoses (Elixhauser measure), and the Queralt DxS.

|  |  | **Coefficients** | | | **OR** | |
| --- | --- | --- | --- | --- | --- | --- |
|  |  | Estimate | St. dev. | p-value | Estimate | 95% CI |
| **Base model** |  |  |  |  |  |  |
| Age 40 - 49 |  | -0.098 | 0.472 | 0.836 | 0.907 | 0.36 - 2.286 |
| Age 50 - 59 |  | 0.435 | 0.379 | 0.250 | 1.545 | 0.736 - 3.246 |
| Age 60 - 69 |  | 0.751 | 0.331 | 0.023 | 2.119 | 1.107 - 4.055 |
| Age 70 - 79 |  | 0.453 | 0.316 | 0.152 | 1.574 | 0.847 - 2.925 |
| Age >=80 |  | 0.560 | 0.305 | 0.067 | 1.750 | 0.962 - 3.184 |
| Women |  | -0.123 | 0.123 | 0.317 | 0.885 | 0.696 - 1.125 |
| **Charlson index** |  |  |  |  |  |  |
| Age 40 - 49 |  | -0.123 | 0.472 | 0.794 | 0.884 | 0.351 - 2.229 |
| Age 50 - 59 |  | 0.391 | 0.380 | 0.304 | 1.478 | 0.702 - 3.114 |
| Age 60 - 69 |  | 0.664 | 0.336 | 0.048 | 1.943 | 1.005 - 3.758 |
| Age 70 - 79 |  | 0.365 | 0.322 | 0.256 | 1.441 | 0.767 - 2.709 |
| Age >=80 |  | 0.492 | 0.309 | 0.111 | 1.635 | 0.893 - 2.996 |
| Women |  | -0.109 | 0.123 | 0.377 | 0.897 | 0.705 - 1.142 |
| **Elixhauser index** |  |  |  |  |  |  |
| Age 40 - 49 |  | -0.145 | 0.477 | 0.761 | 0.865 | 0.34 - 2.201 |
| Age 50 - 59 |  | 0.350 | 0.383 | 0.361 | 1.419 | 0.669 - 3.01 |
| Age 60 - 69 |  | 0.487 | 0.337 | 0.149 | 1.627 | 0.84 - 3.15 |
| Age 70 - 79 |  | 0.214 | 0.321 | 0.505 | 1.238 | 0.661 - 2.321 |
| Age >=80 |  | 0.317 | 0.309 | 0.305 | 1.373 | 0.749 - 2.517 |
| Women |  | -0.061 | 0.125 | 0.624 | 0.941 | 0.736 - 1.202 |
| **Elixhauser measure** |  |  |  |  |  |  |
| Age 40 - 49 |  | -0.270 | 0.475 | 0.569 | 0.763 | 0.301 - 1.936 |
| Age 50 - 59 |  | 0.173 | 0.384 | 0.653 | 1.189 | 0.559 - 2.526 |
| Age 60 - 69 |  | 0.366 | 0.341 | 0.283 | 1.441 | 0.739 - 2.811 |
| Age 70 - 79 |  | -0.008 | 0.330 | 0.981 | 0.992 | 0.519 - 1.895 |
| Age >=80 |  | 0.094 | 0.319 | 0.768 | 1.099 | 0.588 - 2.055 |
| Women |  | -0.110 | 0.124 | 0.375 | 0.896 | 0.703 - 1.142 |
| **Queralt DxS index** |  |  |  |  |  |  |
| Age 40 - 49 |  | -0.546 | 0.520 | 0.294 | 0.579 | 0.209 - 1.606 |
| Age 50 - 59 |  | -0.087 | 0.413 | 0.833 | 0.917 | 0.408 - 2.061 |
| Age 60 - 69 |  | 0.127 | 0.365 | 0.727 | 1.136 | 0.555 - 2.323 |
| Age 70 - 79 |  | -0.392 | 0.354 | 0.268 | 0.676 | 0.338 - 1.351 |
| Age >=80 |  | -0.337 | 0.342 | 0.324 | 0.714 | 0.365 - 1.395 |
| Women |  | -0.138 | 0.137 | 0.313 | 0.871 | 0.666 - 1.139 |

# Supplementary Tables: Performance of the models

## **Table S15.** Performance of the models for explaining critical illness. **First wave.**

**AUPRC:** area under the precision-recall curve. **AUROC**: area under the receiving operating characteristics curve**. BIC:** bayesian criteria. **Int.:** models accounting for interactions between age and the comorbidity measure. The point estimate cells are colored based on a gradient that ranges from red (poorer performance, corresponding to lower values for the AUROCC and AUPRC, and higher values for the BIC) to green (better performance, corresponding to higher values for the AUROCC and AUPRC, and lower values for the BIC). All models have been adjusted for the hospital in which admission occurred.

|  | **BIC** |  | **AUROCC** | | **AUPRC** | |
| --- | --- | --- | --- | --- | --- | --- |
|  |  | Estimate | 95% CI | Estimate | 95% CI |
| Age | 4572 |  | 0.710 | 0.694 - 0.726 | 0.546 | 0.523 - 0.57 |
| Sex | 4818 |  | 0.636 | 0.617 - 0.654 | 0.464 | 0.438 - 0.491 |
| Charlson | 4726 |  | 0.670 | 0.653 - 0.687 | 0.505 | 0.478 - 0.533 |
| Elixhauser (index) | 4612 |  | 0.688 | 0.669 - 0.705 | 0.551 | 0.515 - 0.579 |
| Elixhauser (count) | 4539 |  | 0.715 | 0.697 - 0.731 | 0.549 | 0.513 - 0.581 |
| Queralt DxS | 3787 |  | 0.839 | 0.827 - 0.851 | 0.706 | 0.685 - 0.742 |
|  |  |  |  |  |  |  |
| BL model (age and sex) | 4510 |  | 0.726 | 0.709 - 0.743 | 0.561 | 0.538 - 0.584 |
| BL + Charlson | 4491 |  | 0.732 | 0.716 - 0.749 | 0.564 | 0.538 - 0.595 |
| BL + Elixhauser (index) | 4394 |  | 0.751 | 0.735 - 0.766 | 0.595 | 0.566 - 0.621 |
| BL + Elixhauser (count) | 4386 |  | 0.753 | 0.737 - 0.769 | 0.588 | 0.561 - 0.615 |
| BL + Queralt DxS | 3755 |  | 0.847 | 0.834 - 0.858 | 0.715 | 0.694 - 0.742 |
|  |  |  |  |  |  |  |
| BL + Charlson + int. | 4523 |  | 0.734 | 0.717 - 0.75 | 0.565 | 0.54 - 0.596 |
| BL + Elixhauser (index) + int. | 4409 |  | 0.751 | 0.734 - 0.767 | 0.606 | 0.578 - 0.633 |
| BL + Elixhauser (count) + int. | 4396 |  | 0.755 | 0.739 - 0.771 | 0.591 | 0.569 - 0.618 |
| BL + Queralt DxS + int. | 3730 |  | 0.847 | 0.835 - 0.859 | 0.715 | 0.692 - 0.737 |

## **Table S16.** Performance of the models for explaining critical illness. **Second wave.**

**AUPRC:** area under the precision-recall curve. **AUROC**: area under the receiving operating characteristics curve**. BIC:** bayesian criteria. **Int.:** models accounting for interactions between age and the comorbidity measure. The point estimate cells are colored based on a gradient that ranges from red (poorer performance, corresponding to lower values for the AUROCC and AUPRC, and higher values for the BIC) to green (better performance, corresponding to higher values for the AUROCC and AUPRC, and lower values for the BIC). All models have been adjusted for the hospital in which admission occurred.

|  | **BIC** |  | **AUROCC** | | **AUPRC** | |
| --- | --- | --- | --- | --- | --- | --- |
|  |  | Estimate | 95% CI | Estimate | 95% CI |
| Age | 4239 |  | 0.630 | 0.611 - 0.649 | 0.394 | 0.367 - 0.422 |
| Sex | 4278 |  | 0.593 | 0.574 - 0.613 | 0.369 | 0.346 - 0.392 |
| Charlson | 4242 |  | 0.617 | 0.597 - 0.636 | 0.398 | 0.371 - 0.425 |
| Elixhauser (index) | 4184 |  | 0.637 | 0.616 - 0.659 | 0.434 | 0.406 - 0.467 |
| Elixhauser (count) | 4165 |  | 0.654 | 0.634 - 0.676 | 0.411 | 0.388 - 0.44 |
| Queralt DxS | 3590 |  | 0.786 | 0.77 - 0.802 | 0.612 | 0.583 - 0.646 |
|  |  |  |  |  |  |  |
| BL model (age and sex) | 4221 |  | 0.639 | 0.62 - 0.658 | 0.41 | 0.382 - 0.435 |
| BL + Charlson | 4211 |  | 0.647 | 0.626 - 0.666 | 0.419 | 0.393 - 0.443 |
| BL + Elixhauser (index) | 4161 |  | 0.664 | 0.644 - 0.683 | 0.449 | 0.422 - 0.482 |
| BL + Elixhauser (count) | 4160 |  | 0.666 | 0.648 - 0.685 | 0.430 | 0.404 - 0.451 |
| BL + Queralt DxS | 3619 |  | 0.789 | 0.774 - 0.805 | 0.616 | 0.582 - 0.648 |
|  |  |  |  |  |  |  |
| BL + Charlson + int. | 4240 |  | 0.647 | 0.628 - 0.667 | 0.429 | 0.395 - 0.458 |
| BL + Elixhauser (index) + int. | 4194 |  | 0.666 | 0.646 - 0.687 | 0.454 | 0.427 - 0.49 |
| BL + Elixhauser (count) + int. | 4182 |  | 0.670 | 0.652 - 0.689 | 0.434 | 0.408 - 0.465 |
| BL + Queralt DxS + int. | 3639 |  | 0.790 | 0.774 - 0.806 | 0.617 | 0.583 - 0.646 |

## **Table S17.** Performance of the models for explaining critical illness. **Third wave.**

**AUPRC:** area under the precision-recall curve. **AUROC**: area under the receiving operating characteristics curve**. BIC:** bayesian criteria. **Int.:** models accounting for interactions between age and the comorbidity measure. The point estimate cells are colored based on a gradient that ranges from red (poorer performance, corresponding to lower values for the AUROCC and AUPRC, and higher values for the BIC) to green (better performance, corresponding to higher values for the AUROCC and AUPRC, and lower values for the BIC). All models have been adjusted for the hospital in which admission occurred.

|  | **BIC** |  | **AUROCC** | | **AUPRC** | |
| --- | --- | --- | --- | --- | --- | --- |
|  |  | Estimate | 95% CI | Estimate | 95% CI |
| Age | 3999 |  | 0.627 | 0.607 - 0.647 | 0.453 | 0.426 - 0.482 |
| Sex | 3996 |  | 0.610 | 0.589 - 0.629 | 0.451 | 0.424 - 0.482 |
| Charlson | 4000 |  | 0.614 | 0.593 - 0.636 | 0.446 | 0.414 - 0.474 |
| Elixhauser (index) | 3924 |  | 0.640 | 0.62 - 0.662 | 0.503 | 0.467 - 0.536 |
| Elixhauser (count) | 3927 |  | 0.650 | 0.63 - 0.671 | 0.474 | 0.443 - 0.502 |
| Queralt DxS | 3431 |  | 0.775 | 0.759 - 0.791 | 0.647 | 0.62 - 0.68 |
|  |  |  |  |  |  |  |
| BL model (age and sex) | 3971 |  | 0.645 | 0.625 - 0.664 | 0.480 | 0.452 - 0.503 |
| BL + Charlson | 3974 |  | 0.647 | 0.627 - 0.666 | 0.481 | 0.456 - 0.509 |
| BL + Elixhauser (index) | 3914 |  | 0.667 | 0.647 - 0.688 | 0.525 | 0.488 - 0.552 |
| BL + Elixhauser (count) | 3927 |  | 0.665 | 0.643 - 0.684 | 0.499 | 0.477 - 0.531 |
| BL + Queralt DxS | 3453 |  | 0.780 | 0.763 - 0.797 | 0.654 | 0.633 - 0.682 |
|  |  |  |  |  |  |  |
| BL + Charlson + int. | 4011 |  | 0.648 | 0.629 - 0.668 | 0.480 | 0.455 - 0.508 |
| BL + Elixhauser (index) + int. | 3935 |  | 0.672 | 0.653 - 0.694 | 0.533 | 0.499 - 0.562 |
| BL + Elixhauser (count) + int. | 3947 |  | 0.670 | 0.65 - 0.689 | 0.509 | 0.475 - 0.537 |
| BL + Queralt DxS + int. | 3469 |  | 0.783 | 0.766 - 0.801 | 0.655 | 0.62 - 0.68 |

## **Table S18.** Performance of the models for explaining critical illness. **Fourth wave.**

**AUPRC:** area under the precision-recall curve. **AUROC**: area under the receiving operating characteristics curve**. BIC:** bayesian criteria. **Int.:** models accounting for interactions between age and the comorbidity measure. The point estimate cells are colored based on a gradient that ranges from red (poorer performance, corresponding to lower values for the AUROCC and AUPRC, and higher values for the BIC) to green (better performance, corresponding to higher values for the AUROCC and AUPRC, and lower values for the BIC). All models have been adjusted for the hospital in which admission occurred.

|  | **BIC** |  | **AUROCC** | | **AUPRC** | |
| --- | --- | --- | --- | --- | --- | --- |
|  |  | Estimate | 95% CI | Estimate | 95% CI |
| Age | 2282 |  | 0.638 | 0.614 - 0.663 | 0.503 | 0.459 - 0.552 |
| Sex | 2287 |  | 0.607 | 0.582 - 0.634 | 0.475 | 0.437 - 0.519 |
| Charlson | 2248 |  | 0.634 | 0.607 - 0.661 | 0.522 | 0.482 - 0.556 |
| Elixhauser (index) | 2266 |  | 0.622 | 0.596 - 0.648 | 0.512 | 0.475 - 0.556 |
| Elixhauser (count) | 2212 |  | 0.659 | 0.635 - 0.686 | 0.544 | 0.506 - 0.587 |
| Queralt DxS | 1863 |  | 0.805 | 0.783 - 0.828 | 0.711 | 0.674 - 0.745 |
|  |  |  |  |  |  |  |
| BL model (age and sex) | 2277 |  | 0.646 | 0.618 - 0.672 | 0.512 | 0.463 - 0.555 |
| BL + Charlson | 2255 |  | 0.662 | 0.635 - 0.69 | 0.545 | 0.506 - 0.584 |
| BL + Elixhauser (index) | 2266 |  | 0.655 | 0.626 - 0.678 | 0.537 | 0.505 - 0.573 |
| BL + Elixhauser (count) | 2230 |  | 0.678 | 0.653 - 0.704 | 0.557 | 0.517 - 0.597 |
| BL + Queralt DxS | 1897 |  | 0.808 | 0.785 - 0.827 | 0.714 | 0.672 - 0.746 |
|  |  |  |  |  |  |  |
| BL + Charlson + int. | 2282 |  | 0.667 | 0.642 - 0.692 | 0.551 | 0.512 - 0.588 |
| BL + Elixhauser (index) + int. | 2288 |  | 0.662 | 0.636 - 0.688 | 0.548 | 0.514 - 0.586 |
| BL + Elixhauser (count) + int. | 2260 |  | 0.682 | 0.655 - 0.707 | 0.557 | 0.524 - 0.603 |
| BL + Queralt DxS + int. | 1921 |  | 0.808 | 0.787 - 0.829 | 0.719 | 0.683 - 0.746 |

## **Table S19.** Performance of the models for explaining critical illness. **Fifth wave.**

**AUPRC:** area under the precision-recall curve. **AUROC**: area under the receiving operating characteristics curve**. BIC:** bayesian criteria. **Int.:** models accounting for interactions between age and the comorbidity measure. The point estimate cells are colored based on a gradient that ranges from red (poorer performance, corresponding to lower values for the AUROCC and AUPRC, and higher values for the BIC) to green (better performance, corresponding to higher values for the AUROCC and AUPRC, and lower values for the BIC). All models have been adjusted for the hospital in which admission occurred.

|  | **BIC** |  | **AUROCC** | | **AUPRC** | |
| --- | --- | --- | --- | --- | --- | --- |
|  |  | Estimate | 95% CI | Estimate | 95% CI |
| Age | 3206 |  | 0.625 | 0.602 - 0.647 | 0.487 | 0.453 - 0.517 |
| Sex | 3209 |  | 0.600 | 0.576 - 0.623 | 0.473 | 0.445 - 0.511 |
| Charlson | 3210 |  | 0.602 | 0.577 - 0.623 | 0.462 | 0.428 - 0.495 |
| Elixhauser (index) | 3204 |  | 0.608 | 0.586 - 0.631 | 0.471 | 0.439 - 0.505 |
| Elixhauser (count) | 3151 |  | 0.638 | 0.614 - 0.662 | 0.500 | 0.469 - 0.525 |
| Queralt DxS | 2804 |  | 0.763 | 0.743 - 0.782 | 0.649 | 0.611 - 0.682 |
|  |  |  |  |  |  |  |
| BL model (age and sex) | 3208 |  | 0.630 | 0.607 - 0.651 | 0.495 | 0.461 - 0.527 |
| BL + Charlson | 3215 |  | 0.630 | 0.608 - 0.654 | 0.495 | 0.464 - 0.524 |
| BL + Elixhauser (index) | 3212 |  | 0.631 | 0.609 - 0.653 | 0.498 | 0.47 - 0.533 |
| BL + Elixhauser (count) | 3177 |  | 0.649 | 0.628 - 0.672 | 0.512 | 0.484 - 0.542 |
| BL + Queralt DxS | 2840 |  | 0.765 | 0.746 - 0.785 | 0.652 | 0.618 - 0.688 |
|  |  |  |  |  |  |  |
| BL + Charlson + int. | 3251 |  | 0.631 | 0.61 - 0.655 | 0.494 | 0.456 - 0.523 |
| BL + Elixhauser (index) + int. | 3232 |  | 0.644 | 0.62 - 0.665 | 0.509 | 0.48 - 0.545 |
| BL + Elixhauser (count) + int. | 3200 |  | 0.653 | 0.63 - 0.676 | 0.526 | 0.488 - 0.552 |
| BL + Queralt DxS + int. | 2869 |  | 0.765 | 0.746 - 0.785 | 0.654 | 0.626 - 0.695 |

## **Table S20.** Performance of the models for explaining critical illness. **Sixth wave.**

**AUPRC:** area under the precision-recall curve. **AUROC**: area under the receiving operating characteristics curve**. BIC:** bayesian criteria. **Int.:** models accounting for interactions between age and the comorbidity measure. The point estimate cells are colored based on a gradient that ranges from red (poorer performance, corresponding to lower values for the AUROCC and AUPRC, and higher values for the BIC) to green (better performance, corresponding to higher values for the AUROCC and AUPRC, and lower values for the BIC). All models have been adjusted for the hospital in which admission occurred.

|  | **BIC** |  | **AUROCC** | | **AUPRC** | |
| --- | --- | --- | --- | --- | --- | --- |
|  |  | Estimate | 95% CI | Estimate | 95% CI |
| Age | 3906 |  | 0.628 | 0.607 - 0.648 | 0.458 | 0.432 - 0.488 |
| Sex | 3898 |  | 0.619 | 0.599 - 0.64 | 0.454 | 0.425 - 0.479 |
| Charlson | 3909 |  | 0.614 | 0.595 - 0.635 | 0.437 | 0.41 - 0.465 |
| Elixhauser (index) | 3881 |  | 0.628 | 0.608 - 0.65 | 0.454 | 0.432 - 0.485 |
| Elixhauser (count) | 3877 |  | 0.634 | 0.612 - 0.655 | 0.454 | 0.427 - 0.477 |
| Queralt DxS | 3479 |  | 0.746 | 0.729 - 0.766 | 0.621 | 0.597 - 0.65 |
|  |  |  |  |  |  |  |
| BL model (age and sex) | 3897 |  | 0.639 | 0.617 - 0.659 | 0.471 | 0.443 - 0.499 |
| BL + Charlson | 3904 |  | 0.640 | 0.618 - 0.662 | 0.467 | 0.439 - 0.496 |
| BL + Elixhauser (index) | 3881 |  | 0.650 | 0.631 - 0.672 | 0.476 | 0.448 - 0.507 |
| BL + Elixhauser (count) | 3883 |  | 0.651 | 0.63 - 0.671 | 0.471 | 0.441 - 0.498 |
| BL + Queralt DxS | 3503 |  | 0.751 | 0.733 - 0.77 | 0.624 | 0.59 - 0.656 |
|  |  |  |  |  |  |  |
| BL + Charlson + int. | 3932 |  | 0.643 | 0.623 - 0.664 | 0.471 | 0.442 - 0.497 |
| BL + Elixhauser (index) + int. | 3909 |  | 0.655 | 0.634 - 0.676 | 0.481 | 0.451 - 0.517 |
| BL + Elixhauser (count) + int. | 3911 |  | 0.653 | 0.633 - 0.672 | 0.475 | 0.441 - 0.502 |
| BL + Queralt DxS + int. | 3531 |  | 0.752 | 0.734 - 0.77 | 0.629 | 0.604 - 0.655 |

## **Table S21.** Performance of the models for explaining critical illness. **Seventh wave.**

**AUPRC:** area under the precision-recall curve. **AUROC**: area under the receiving operating characteristics curve**. BIC:** bayesian criteria. **Int.:** models accounting for interactions between age and the comorbidity measure. The point estimate cells are colored based on a gradient that ranges from red (poorer performance, corresponding to lower values for the AUROCC and AUPRC, and higher values for the BIC) to green (better performance, corresponding to higher values for the AUROCC and AUPRC, and lower values for the BIC). All models have been adjusted for the hospital in which admission occurred.

|  | **BIC** |  | **AUROCC** | | **AUPRC** | |
| --- | --- | --- | --- | --- | --- | --- |
|  |  | Estimate | 95% CI | Estimate | 95% CI |
| Age | 1934 |  | 0.610 | 0.576 - 0.64 | 0.241 | 0.215 - 0.28 |
| Sex | 1911 |  | 0.600 | 0.566 - 0.633 | 0.220 | 0.192 - 0.251 |
| Charlson | 1908 |  | 0.605 | 0.574 - 0.638 | 0.232 | 0.206 - 0.267 |
| Elixhauser (index) | 1848 |  | 0.657 | 0.625 - 0.688 | 0.302 | 0.264 - 0.347 |
| Elixhauser (count) | 1880 |  | 0.637 | 0.605 - 0.669 | 0.256 | 0.221 - 0.3 |
| Queralt DxS | 1614 |  | 0.782 | 0.753 - 0.81 | 0.490 | 0.435 - 0.532 |
|  |  |  |  |  |  |  |
| BL model (age and sex) | 1940 |  | 0.611 | 0.579 - 0.643 | 0.243 | 0.213 - 0.288 |
| BL + Charlson | 1946 |  | 0.613 | 0.58 - 0.643 | 0.246 | 0.217 - 0.291 |
| BL + Elixhauser (index) | 1889 |  | 0.664 | 0.634 - 0.695 | 0.303 | 0.259 - 0.352 |
| BL + Elixhauser (count) | 1920 |  | 0.641 | 0.609 - 0.672 | 0.262 | 0.223 - 0.299 |
| BL + Queralt DxS | 1652 |  | 0.785 | 0.757 - 0.812 | 0.495 | 0.458 - 0.545 |
|  |  |  |  |  |  |  |
| BL + Charlson + int. | 1981 |  | 0.617 | 0.587 - 0.647 | 0.244 | 0.213 - 0.287 |
| BL + Elixhauser (index) + int. | 1924 |  | 0.667 | 0.636 - 0.697 | 0.312 | 0.275 - 0.363 |
| BL + Elixhauser (count) + int. | 1949 |  | 0.652 | 0.621 - 0.684 | 0.268 | 0.228 - 0.31 |
| BL + Queralt DxS + int. | 1688 |  | 0.785 | 0.759 - 0.813 | 0.496 | 0.449 - 0.54 |

# Supplementary Tables: Causal mediation analysis by wave

## **Table S22.** Causal mediation effect, direct effect, and proportion of mediation effect by comorbidity measures. **First wave**.

The proportion mediated shows the contribution of the comorbidity-mediating pathway to critical illness, estimated as the proportion between the ACME and the total effect. **ACME**: average causal mediation effect of comorbidity (mediator). **ADE**: average direct effect of age.

| **Measure** | **Effect** | **Estimate** | **IC** | **95%** |
| --- | --- | --- | --- | --- |
| Charlson index | ACME | 0.02752 | 0.01674 | 0.03917 |
|  | ADE | 0.21176 | 0.17976 | 0.24267 |
|  | Total effect | 0.23928 | 0.21217 | 0.26554 |
|  | prop. Mediation | 0.11500 | 0.06800 | 0.16700 |
| Elixhauser index | ACME | 0.03926 | 0.03145 | 0.04775 |
|  | ADE | 0.19690 | 0.16954 | 0.22703 |
|  | Total effect | 0.23616 | 0.20885 | 0.26515 |
|  | prop. Mediation | 0.16600 | 0.12900 | 0.20900 |
| Elixhauser measure | ACME | 0.07308 | 0.06004 | 0.08588 |
|  | ADE | 0.16234 | 0.13149 | 0.19461 |
|  | Total effect | 0.23542 | 0.20723 | 0.26306 |
|  | prop. Mediation | 0.31000 | 0.24500 | 0.38300 |
| Queralt DxS index | ACME | 0.14664 | 0.13110 | 0.16413 |
|  | ADE | 0.06922 | 0.04064 | 0.09791 |
|  | Total effect | 0.21585 | 0.18925 | 0.24334 |
|  | prop. Mediation | 0.67900 | 0.58600 | 0.79200 |

## **Table S23.** Causal mediation effect, direct effect, and proportion of mediation effect by comorbidity measures. **Second wave**.

The proportion mediated shows the contribution of the comorbidity-mediating pathway to critical illness, estimated as the proportion between the ACME and the total effect. **ACME**: average causal mediation effect of comorbidity (mediator). **ADE**: average direct effect of age.

| **Measure** | **Effect** | **Estimate** | **IC** | **95%** |
| --- | --- | --- | --- | --- |
| Charlson index | ACME | 0.01983 | 0.01139 | 0.02826 |
|  | ADE | 0.09269 | 0.06828 | 0.11916 |
|  | Total effect | 0.11253 | 0.08933 | 0.13555 |
|  | prop. Mediation | 0.17600 | 0.09800 | 0.27100 |
| Elixhauser index | ACME | 0.02249 | 0.01637 | 0.02896 |
|  | ADE | 0.08950 | 0.06638 | 0.11397 |
|  | Total effect | 0.11198 | 0.08951 | 0.13596 |
|  | prop. Mediation | 0.20100 | 0.13900 | 0.27700 |
| Elixhauser measure | ACME | 0.05265 | 0.04131 | 0.06510 |
|  | ADE | 0.05854 | 0.03037 | 0.08544 |
|  | Total effect | 0.11119 | 0.08493 | 0.13464 |
|  | prop. Mediation | 0.47300 | 0.34100 | 0.66400 |
| Queralt DxS index | ACME | 0.09961 | 0.08529 | 0.11285 |
|  | ADE | -0.00037 | -0.02530 | 0.02670 |
|  | Total effect | 0.09924 | 0.07471 | 0.12393 |
|  | prop. Mediation | 1.00400 | 0.78100 | 1.33100 |

## **Table S24.** Causal mediation effect, direct effect, and proportion of mediation effect by comorbidity measures. **Third wave**.

The proportion mediated shows the contribution of the comorbidity-mediating pathway to critical illness, estimated as the proportion between the ACME and the total effect. **ACME**: average causal mediation effect of comorbidity (mediator). **ADE**: average direct effect of age.

| **Measure** | **Effect** | **Estimate** | **IC** | **95%** |
| --- | --- | --- | --- | --- |
| Charlson index | ACME | 0.01176 | 0.00163 | 0.02262 |
|  | ADE | 0.09221 | 0.06361 | 0.12210 |
|  | Total effect | 0.10397 | 0.07797 | 0.13065 |
|  | prop. Mediation | 0.11300 | 0.01600 | 0.23200 |
| Elixhauser index | ACME | 0.02547 | 0.01781 | 0.03376 |
|  | ADE | 0.07588 | 0.04781 | 0.10158 |
|  | Total effect | 0.10135 | 0.07426 | 0.12664 |
|  | prop. Mediation | 0.25100 | 0.16800 | 0.37300 |
| Elixhauser measure | ACME | 0.05544 | 0.04126 | 0.06973 |
|  | ADE | 0.04622 | 0.01439 | 0.07923 |
|  | Total effect | 0.10165 | 0.07412 | 0.12987 |
|  | prop. Mediation | 0.54500 | 0.36900 | 0.81000 |
| Queralt DxS index | ACME | 0.11021 | 0.09657 | 0.12354 |
|  | ADE | -0.01751 | -0.04601 | 0.01042 |
|  | Total effect | 0.09270 | 0.06338 | 0.12031 |
|  | prop. Mediation | 1.18900 | 0.91100 | 1.70900 |

## **Table S25.** Causal mediation effect, direct effect, and proportion of mediation effect by comorbidity measures. **Fourth wave**.

The proportion mediated shows the contribution of the comorbidity-mediating pathway to critical illness, estimated as the proportion between the ACME and the total effect. **ACME**: average causal mediation effect of comorbidity (mediator). **ADE**: average direct effect of age.

| **Measure** | **Effect** | **Estimate** | **IC** | **95%** |
| --- | --- | --- | --- | --- |
| Charlson index | ACME | 0.02848 | 0.01776 | 0.04012 |
|  | ADE | 0.11256 | 0.06994 | 0.15621 |
|  | Total effect | 0.14103 | 0.10073 | 0.18252 |
|  | prop. Mediation | 0.20200 | 0.11900 | 0.32000 |
| Elixhauser index | ACME | 0.01405 | 0.00665 | 0.02224 |
|  | ADE | 0.12562 | 0.08556 | 0.16812 |
|  | Total effect | 0.13967 | 0.10067 | 0.18067 |
|  | prop. Mediation | 0.10100 | 0.04400 | 0.17400 |
| Elixhauser measure | ACME | 0.05802 | 0.04194 | 0.07636 |
|  | ADE | 0.07761 | 0.03479 | 0.12267 |
|  | Total effect | 0.13563 | 0.09591 | 0.17758 |
|  | prop. Mediation | 0.42800 | 0.28100 | 0.65200 |
| Queralt DxS index | ACME | 0.11042 | 0.08675 | 0.13376 |
|  | ADE | 0.01868 | -0.02670 | 0.06285 |
|  | Total effect | 0.12910 | 0.08543 | 0.16972 |
|  | prop. Mediation | 0.85500 | 0.61800 | 1.29800 |

**Table S26.** Causal mediation effect, direct effect, and proportion of mediation effect by comorbidity measures. **Fifth wave**.

The proportion mediated shows the contribution of the comorbidity-mediating pathway to critical illness, estimated as the proportion between the ACME and the total effect. **ACME**: average causal mediation effect of comorbidity (mediator). **ADE**: average direct effect of age

| **Measure** | **Effect** | **Estimate** | **IC** | **95%** |
| --- | --- | --- | --- | --- |
| Charlson index | ACME | 0.00173 | -0.00555 | 0.00934 |
|  | ADE | 0.08552 | 0.05432 | 0.11702 |
|  | Total effect | 0.08726 | 0.05704 | 0.11778 |
|  | prop. Mediation | 0.02000 | -0.06700 | 0.11900 |
| Elixhauser index | ACME | 0.00460 | -0.00077 | 0.01015 |
|  | ADE | 0.08571 | 0.05432 | 0.11718 |
|  | Total effect | 0.09031 | 0.05917 | 0.12166 |
|  | prop. Mediation | 0.05100 | -0.00900 | 0.12200 |
| Elixhauser measure | ACME | 0.04303 | 0.03010 | 0.05683 |
|  | ADE | 0.02227 | -0.01430 | 0.05862 |
|  | Total effect | 0.06530 | 0.03129 | 0.09901 |
|  | prop. Mediation | 0.65900 | 0.38200 | 141800 |
| Queralt DxS index | ACME | 0.08316 | 0.06796 | 0.09734 |
|  | ADE | -0.00660 | -0.03728 | 0.02694 |
|  | Total effect | 0.07656 | 0.04469 | 0.10985 |
|  | prop. Mediation | 1.08600 | 0.74600 | 1.78500 |

## **Table S27.** Causal mediation effect, direct effect, and proportion of mediation effect by comorbidity measures. **Sixth wave**.

The proportion mediated shows the contribution of the comorbidity-mediating pathway to critical illness, estimated as the proportion between the ACME and the total effect. **ACME**: average causal mediation effect of comorbidity (mediator). **ADE**: average direct effect of age.

| **Measure** | **Effect** | **Estimate** | **IC** | **95%** |
| --- | --- | --- | --- | --- |
| Charlson index | ACME | -0.00126 | -0.00652 | 0.00373 |
|  | ADE | 0.08557 | 0.06211 | 0.10938 |
|  | Total effect | 0.08432 | 0.06127 | 0.10752 |
|  | prop. Mediation | -0.01500 | -0.08200 | 0.04800 |
| Elixhauser index | ACME | 0.00582 | 0.00237 | 0.00980 |
|  | ADE | 0.07212 | 0.04941 | 0.09444 |
|  | Total effect | 0.07794 | 0.05527 | 0.10017 |
|  | prop. Mediation | 0.07500 | 0.02900 | 0.13600 |
| Elixhauser measure | ACME | 0.01747 | 0.01000 | 0.02592 |
|  | ADE | 0.05737 | 0.02816 | 0.08332 |
|  | Total effect | 0.07484 | 0.04834 | 0.09835 |
|  | prop. Mediation | 0.23300 | 0.12200 | 0.44100 |
| Queralt DxS index | ACME | 0.05808 | 0.04805 | 0.06878 |
|  | ADE | 0.01749 | -0.00618 | 0.04128 |
|  | Total effect | 0.07556 | 0.05210 | 0.09755 |
|  | prop. Mediation | 0.76900 | 0.56600 | 1.11000 |

## **Table S28.** Causal mediation effect, direct effect, and proportion of mediation effect by comorbidity measures. **Seventh wave**.

The proportion mediated shows the contribution of the comorbidity-mediating pathway to critical illness, estimated as the proportion between the ACME and the total effect. **ACME**: average causal mediation effect of comorbidity (mediator). **ADE**: average direct effect of age.

| **Measure** | **Effect** | **Estimate** | **IC** | **95%** |
| --- | --- | --- | --- | --- |
| Charlson index | ACME | 0.00232 | -0.00215 | 0.00645 |
|  | ADE | 0.02828 | 0.00258 | 0.05124 |
|  | Total effect | 0.03059 | 0.00646 | 0.05229 |
|  | prop. Mediation | 0.07600 | -0.08600 | 0.46600 |
| Elixhauser index | ACME | 0.00875 | 0.00489 | 0.01348 |
|  | ADE | 0.02131 | -0.00215 | 0.04357 |
|  | Total effect | 0.03006 | 0.00773 | 0.05155 |
|  | prop. Mediation | 0.29100 | 0.12200 | 109800 |
| Elixhauser measure | ACME | 0.01940 | 0.01077 | 0.02981 |
|  | ADE | 0.00684 | -0.02535 | 0.03399 |
|  | Total effect | 0.02624 | 0.00033 | 0.04969 |
|  | prop. Mediation | 0.73900 | 0.03800 | 6.38600 |
| Queralt DxS index | ACME | 0.03555 | 0.02734 | 0.04471 |
|  | ADE | -0.00809 | -0.03321 | 0.01473 |
|  | Total effect | 0.02746 | 0.00491 | 0.04864 |
|  | prop. Mediation | 1.29500 | 0.63500 | 5.29100 |
